## Dynamic shifts of visual and saccadic signals in prefrontal cortical regions 8Ar and FEF

Sanjeev B. Khanna<sup>1,2,3</sup>, Jonathan A. Scott<sup>3</sup>, Matthew A. Smith<sup>1,2,3,4,5</sup>

1: Dept. of Ophthalmology, Univ. of Pittsburgh, Pittsburgh, PA, USA

2: Center for the Neural Basis of Cognition, Univ. of Pittsburgh, Pittsburgh, PA, USA

3: Dept. of Bioengineering, Univ. of Pittsburgh, Pittsburgh, PA, USA

4: Dept. of Biomedical Engineering, Carnegie Mellon University, Pittsburgh, PA, USA

5: Carnegie Mellon Neuroscience Institute, Pittsburgh, PA, USA

#: Address correspondence to:

Matthew A. Smith

Department of Biomedical Engineering and Neuroscience Institute

Carnegie Mellon University

4400 Fifth Avenue Room 115

Pittsburgh, PA, 15213

Tel: (412) 268-9989

Email: [matt@smithlab.net](mailto:matt@smithlab.net)

Abbreviated title: Sensorimotor signals in prefrontal cortex

Key words: prefrontal cortex, saccade, working memory, receptive field, dynamics

Conflict of interest: "The authors declare no competing financial interests."

### Acknowledgements

This work was supported by the National Institutes of Health (R01EY022928, R01MH118929, R01EB026953, P30EY008098); National Science Foundation (NCS 1734901); a career development grant and an unrestricted award from Research to Prevent Blindness; the Eye and Ear Foundation of Pittsburgh; and a National Institute of Health training grant (T32 EY017271-08 to S.B.K). We are grateful to Samantha Schmitt for technical assistance and Dr. Adam C.

Snyder for his assistance with array implants and behavioral training for an unrelated experiment which facilitated this additional data collection in prefrontal cortex.

1 **Abstract**

2 Active vision is a fundamental process by which primates gather information about the  
3 external world. Multiple brain regions have been studied in the context of simple active vision  
4 tasks in which a visual target's appearance is temporally separated from saccade execution.  
5 Most neurons have tight spatial registration between visual and saccadic signals, and in areas  
6 such as prefrontal cortex (PFC) some neurons show persistent delay activity that links visual  
7 and motor epochs and has been proposed as a basis for spatial working memory. Many PFC  
8 neurons also show rich dynamics, which have been attributed to alternative working memory  
9 codes and the representation of other task variables. Our study investigated the transition  
10 between processing a visual stimulus and generating an eye movement in populations of PFC  
11 neurons in macaque monkeys performing a memory guided saccade task. We found that  
12 neurons in two subregions of PFC, the frontal eye fields (FEF) and area 8Ar, differed in their  
13 dynamics and spatial response profiles. These dynamics could be attributed largely to shifts in  
14 the spatial profile of visual and motor responses in individual neurons. This led to visual and  
15 motor codes for particular spatial locations that were instantiated by different mixtures of  
16 neurons, which could be important in PFC's flexible role in multiple sensory, cognitive, and  
17 motor tasks.

18

19 **New and Noteworthy**

20 A central question in neuroscience is how the brain transitions from sensory representations to  
21 motor outputs. The prefrontal cortex contains neurons that have long been implicated as  
22 important in this transition and in working memory. We found evidence for rich and diverse  
23 tuning in these neurons, that was often spatially misaligned between visual and saccadic  
24 responses. This feature may play an important role in flexible working memory capabilities.

25

26

27

## 28 **Introduction**

29           The process of gathering information about the external world and acting on it  
30 necessitates sensorimotor integration and is crucial for survival and adaptation to the  
31 environment. In a simple idealized organism, visual space could be directly mapped onto motor  
32 responses. This type of architecture would be well suited to direct orienting responses in a  
33 hardwired fashion, where a stimulus and resulting movement need to be processed and  
34 generated rapidly. Within the oculomotor domain, one example of a behavior that could be  
35 accomplished by such a direct mapping is the generation of a rapid, ballistic eye movement  
36 (saccade) to a visual stimulus. Neurons in the superior colliculus (SC), a midbrain region tightly  
37 coupled to the brain stem circuits that move the eyes, have overlapping visual and movement-  
38 related activity (Wurtz & Goldberg 1972). Such a tight alignment might be ideal for the rapid  
39 translation of perception to action, and is particularly important in cognitive functions such as  
40 attention that involve a tight interaction between visual and saccadic maps (Krauzlis et al 2013).  
41 However, in many instances, stimuli must be represented first and acted on later with one of  
42 several motor output modalities in the context of different cognitive constraints. The means by  
43 which such flexible sensorimotor behavior is achieved is an important mystery in neuroscience.

44           Sensorimotor signals have been extensively studied in the context of eye movements,  
45 which are a critical part of primate behavior but also have the advantage of high repeatability  
46 and a limited number of degrees of freedom. In particular, tasks in which the onset of the visual  
47 stimulus and the eye movement are temporally separated (such as the memory-guided  
48 saccade, or MGS) have been used to study the transformation from perception to action.  
49 Neurons in oculomotor regions of the cortex typically do not respond exclusively to a visual  
50 stimulus or an eye movement. Instead, they demonstrate a wide variety of activity profiles

51 relating to their visuomotor response properties and the timing and duration of their activity. Two  
52 prefrontal cortical regions which contain neurons with these diverse response properties are the  
53 frontal eye fields (FEF) and the pre-arcuate gyrus (Bullock et al 2017, Kiani et al 2015, Preuss &  
54 Goldman-Rakic 1991, Schall et al 1995). In both regions, neurons respond to visual stimuli, eye  
55 movements, or both in varying degrees (Boch & Goldberg 1989, Bruce & Goldberg 1985,  
56 Funahashi et al 1991). Additionally, some neurons fire transient bursts often aligned to stimulus  
57 or saccade onset, while others maintain their activity throughout the period between the visual  
58 stimulus and saccade (Funahashi et al 1989, Funahashi et al 1990, Fuster & Alexander 1971).  
59 Activity that is elevated and sustained during the entire delay epoch (the period of time after the  
60 spatial location is stored in memory but before it must be retrieved), referred to as persistent  
61 activity, has been proposed to underlie spatial working memory (Goldman-Rakic 1995).  
62 However, while some neurons maintain relatively constant activity in the delay period, many  
63 others exhibit changes over time such as ramping up or down or shifts in preference. This has  
64 led to ongoing debate about the nature of neural signals related to working memory (for review,  
65 see Constantinidis et al (2018) and Lundqvist et al (2018)) and also provides insight into the  
66 transition between visual and motor signals.

67         The predominant observation of FEF neurons has been of alignment between sensory  
68 and motor responses in representing the contralateral visual field (Bruce & Goldberg 1985),  
69 similar to SC. However, a small subset of FEF neurons have ipsilateral receptive fields (Crapse  
70 & Sommer 2009, Schall 1991) and can even show misalignment between their delay period and  
71 peri-saccadic tuning (Lawrence et al 2005). In 8Ar, there are also neurons with ipsilateral  
72 receptive fields (Mikami et al 1982, Suzuki & Azuma 1983) and bilateral responses (Bullock et al  
73 2017). Some PFC neurons change their tuning during the delay epoch (Parthasarathy et al  
74 2017, Spaak et al 2017), which has led some to propose alternatives to the persistent activity  
75 model of working memory, such as “activity silent” mechanisms (Stokes 2015), or oscillatory

76 dynamics (Lundqvist et al 2016). Setting aside the question of how working memory is stored,  
77 there is abundant evidence that neurons in PFC represent a myriad of perceptual and task-  
78 related variables, such as reward (Leon & Shadlen 1999, Watanabe 1996), abstract rules  
79 (Wallis et al 2001), time during the delay (Jun et al 2010, Spaak et al 2017), previous trial  
80 outcome (Donahue & Lee 2015), and stimulus shape and color (Riley et al 2017). A  
81 misalignment of visual and eye movement signals could be the consequence of, and potentially  
82 beneficial for, a flexible coding architecture in which multiple perceptual inputs (e.g., visual or  
83 auditory) are associated with multiple motor outputs (e.g., a saccade or a reach). In this case,  
84 the dynamics of activity during the delay period may not solely represent the evolution of a  
85 working memory signal, but also the transition between two different representations in the  
86 neuronal population. We wondered if and how the visual and saccadic signals align in FEF and  
87 8Ar, and whether there were systematic rules by which neurons shifted their response profiles.

88         To answer these questions, we recorded from groups of 8Ar and FEF neurons in  
89 macaque monkeys performing a memory guided saccade task. The reliable timing of the task  
90 and saccadic response allowed us to isolate visual and motor signals. We first characterized the  
91 receptive field structure of 8Ar neurons in response to a briefly flashed visual stimulus as well as  
92 the motor response field around the time of the saccade. Importantly, we used a dense mapping  
93 of space to achieve a high-resolution spatial response profile. We found a remarkable amount of  
94 diversity, both spatially and temporally, in the response properties of 8Ar neurons. A key pattern  
95 in this diversity was spatial and temporal opponency – many neurons were suppressed at  
96 spatial locations opposite their preferred response, and their preferences shifted over time from  
97 shortly after stimulus onset to the time of the saccade, sometimes to the opposite hemifield. To  
98 quantitatively assess at the population level the observations that we made in individual  
99 neurons, we measured the ability to decode the target location in 8Ar and FEF neurons. We  
100 found that the diverse response properties observed in 8Ar are less prominent in FEF, and that

101 the population code in 8Ar is more dynamic, meaning that the visual and motor codes were less  
102 aligned. Taken together, our results are consistent with a neural circuit structure in which the  
103 visual and saccadic representations are gradually segregated with increasing distance from the  
104 motor output. This may aid in 8Ar playing a flexible role in various types of sensorimotor  
105 behavior and cognitive states, associating a variety of sensory inputs with potential motor  
106 outputs.

107

## 108 **Materials and Methods**

### 109 *Neuronal recordings*

110 *Surgical Preparation.* A 96-electrode “Utah” Array (Blackrock Microsystems, Salt Lake City, UT)  
111 was implanted into two adult, male rhesus macaques (*Macaca mulatta*) in dorsolateral prefrontal  
112 cortex using sterile surgical techniques under isoflurane anesthesia. The array was implanted in  
113 right 8Ar for Monkey Pe and left 8Ar for Monkey Wa, on the pre-arcuate gyrus immediately  
114 anterior to the arcuate sulcus and medial to the principal sulcus (Figure 1A). For FEF  
115 recordings, two adult male rhesus macaques (*Macaca mulatta*; monkeys Ro and Wi) were  
116 surgically implanted with FEF recording chambers (aimed for the anterior bank of the arcuate  
117 sulcus, centered at stereotaxic coordinates: 25 anterior, 20 lateral) and extracellular activity was  
118 recorded with a 16-electrode linear microelectrode array (U-Probe, Plexon, Dallas TX) with  
119 contacts spaced 150  $\mu\text{m}$  apart. Linear arrays were lowered into FEF daily using a custom  
120 designed mechanical microdrive (Laboratory for Sensorimotor Research, National Eye Institute,  
121 Bethesda, MD) through a plastic grid with 1 mm spacing. The FEF recordings included in this  
122 analysis were part of a larger dataset previously published (Khanna et al 2019). The location of  
123 FEF was first identified by physiological response properties to visual stimuli and saccades, and  
124 then confirmed through microstimulation. Recording sites were considered to be in FEF if  
125 saccades could be reliably (>50%) evoked using low threshold microstimulation ( $\leq 50 \mu\text{A}$ , 0.25

126 ms pulse width, 70 ms pulse train duration, 350 Hz stimulation frequency) (Bruce et al 1985) at  
127 that location or at an immediately neighboring grid location (1mm away). Of note, we were not  
128 able to induce eye movements by stimulating any electrodes on the 8Ar arrays, even with  
129 microstimulation up to currents of 150  $\mu$ A. The head was immobilized during recordings with a  
130 titanium headpost attached to the skull with titanium screws, implanted in a separate procedure  
131 before the array or chamber implants. All procedures were approved by the Institutional Animal  
132 Care and Use Committee of the University of Pittsburgh and complied with guidelines set forth  
133 in the National Institute of Health's *Guide for the Care and Use of Laboratory Animals*.

134  
135 *Data Collection.* Stimuli were displayed on a 21" cathode ray tube monitor with a resolution of  
136 1024x768 pixels and a refresh rate of 100 Hz at viewing distance of 36 cm. Stimuli were  
137 generated using custom software written in MATLAB (MathWorks, Natick, MA) with the  
138 Psychophysics Toolbox extensions (Brainard 1997, Kleiner et al 2007, Pelli 1997). Eye position  
139 was tracked monocularly using an infrared system at 1000 Hz resolution (EyeLink 1000, SR  
140 Research, Mississauga, Canada). In both the FEF and 8Ar recordings, extracellular activity was  
141 recorded from the array, band-pass filtered (0.3 – 7,500 Hz), digitized at 30 kHz, and amplified  
142 by a Grapevine system (Ripple, Salt Lake City, UT). Waveforms that exceeded a threshold were  
143 saved and stored for offline wave classification. The threshold was set by taking a value  
144 (typically -3) and multiplying it by the root mean squared noise measured on each channel.  
145 Waveforms were automatically sorted using a competitive mixture decomposition algorithm  
146 (Shoham et al 2003) and later refined manually based on waveform shape characteristics and  
147 inter-spike interval distributions using custom time amplitude window discrimination software  
148 written in MATLAB (<https://github.com/smithlabvision/spikesort>).

149 After the waveforms were sorted, the signal-to-noise ratio (SNR) was calculated for each  
150 identified unit as the ratio of the average waveform amplitude to the standard deviation of the



151 waveform noise (Kelly et al 2007). We considered only candidate units with an SNR above 2.5  
152 as isolated single neurons for the purpose of further analysis. This resulted in a total of 2511  
153 neurons across 39 recording sessions in 8Ar (Monkey Wa: 1179 units, 20 sessions; Monkey Pe:  
154 1332 units, 19 sessions) and 889 neurons across 50 sessions in FEF (Monkey Wi: 305 units, 14  
155 sessions; Monkey Ro: 584 units, 36 sessions). We did not attempt to determine whether the  
156 same units were recorded across multiple days with the Utah array recordings. It is likely that  
157 this did occur in some cases, although our recording sessions from 8Ar were often spaced out  
158 by a week or more as the animals were also performing an unrelated experiment at the same  
159 time. Results from a single session from each animal are shown in Figure 11, and show the  
160 representative features of the data from the full population analysis. In FEF, because the U-  
161 Probe was inserted in each recording session and in multiple different chamber locations,  
162 recording from the same unit across days was not a concern.

163

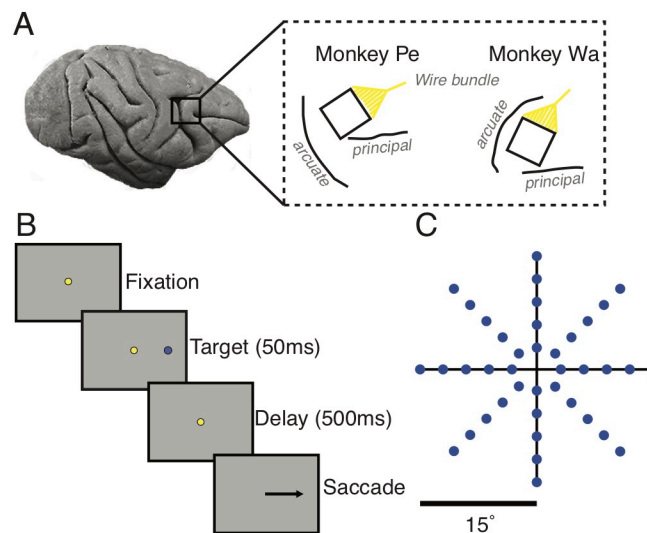

164

165 *Figure 1: Electrode array locations and task. A) 96 channel Utah arrays were placed in dorsolateral prefrontal cortex*  
166 *(8Ar) on the prearcuate gyrus, anterior to the arcuate sulcus and medial to the principal sulcus. The line drawings*  
167 *indicate visible sulcal patterns through the durotomy and are not meant to represent the full extent of the arcuate and*  
168 *principal sulci. B) Memory guided saccade task. Each trial began with the subject fixating on a central dot. After 200*  
169 *ms of fixation, a target appeared briefly in the periphery for 50 ms. Following a delay of 500 ms, the fixation point was*  
170 *extinguished, signaling the subject to saccade to the remembered location of the target. C) Targets appeared at 1 of*  
171 *40 locations, varying in amplitude and direction (only 8 directions with a single amplitude were used for FEF).*

172

173 *Experimental design and statistical analysis*

174 *Behavioral task.* Monkeys performed a standard memory guided saccade (MGS) task (Figure  
175 1B) (Hikosaka & Wurtz 1983). The trial commenced when the subject fixated a small blue dot  
176 ( $0.5^\circ$  diameter) at the center of the screen. For 8Ar recordings, after fixation was established  
177 (200 ms), a target appeared in the periphery at one of eight angular directions ( $0^\circ$ ,  $45^\circ$ ,  $90^\circ$ ,  
178  $135^\circ$ ,  $180^\circ$ ,  $225^\circ$ ,  $270^\circ$ ,  $315^\circ$ ) and one of five eccentricities ( $5^\circ$ ,  $7.5^\circ$ ,  $9.9^\circ$ ,  $12.3^\circ$ ,  $14.7^\circ$ ) (40 total  
179 possible locations, Figure 1C) for 50 ms. The animal was required to maintain fixation for 500  
180 ms after the target was extinguished, at which point the central fixation point would disappear,  
181 signaling the animal to saccade to the remembered location of the stimulus. The monkey had  
182 500 ms to initiate the saccade, and once it had been initiated (defined as the monkey's eye  
183 position leaving a window  $1.8^\circ$  in diameter around the fixation point) the monkey's eye position  
184 had to reach the saccade target within 200 ms and maintain gaze within  $2.7^\circ$  of the location for  
185 150 ms to receive a liquid reward. Each block consisted of pseudorandomized presentations of  
186 all 40 conditions, with at least 40 blocks gathered per session (average 58). For 4 of the 20  
187 sessions in Monkey Wa, the angular directions and target eccentricities were different (angles  
188  $26^\circ$ ,  $71^\circ$ ,  $116^\circ$ ,  $161^\circ$ ,  $206^\circ$ ,  $251^\circ$ ,  $296^\circ$ ,  $341^\circ$ ; amplitudes  $2.6^\circ$ ,  $3.9^\circ$ ,  $5.2^\circ$ ,  $6.5^\circ$ ,  $7.8^\circ$ ). Data from  
189 these sessions were included in population analyses when possible by using the large-  
190 amplitude trials ( $7.8^\circ$ ) but were not included in the population average response field analyses  
191 (Figure 4A, B). For FEF recordings, the same behavioral task (MGS) was used, with stimuli  
192 appearing at one of eight angular directions ( $0^\circ$ ,  $45^\circ$ ,  $90^\circ$ ,  $135^\circ$ ,  $180^\circ$ ,  $225^\circ$ ,  $270^\circ$ ,  $315^\circ$ ) but at  
193 only one amplitude ( $10^\circ$ ). The fixation time before target onset (200 ms) and target duration (50  
194 ms) were equal to 8Ar, however the delay epoch was 600 ms (as opposed to 500ms for 8Ar).  
195 Each block consisted of pseudorandomized presentations of all eight conditions, with at least 50  
196 blocks gathered per session (average 132). On a subset of days, after the fixation point was

197 extinguished and the monkey began its saccade, the target was re-illuminated to aid in saccade  
198 completion. The analyses presented here were not affected by this target because all analysis  
199 windows were constructed to end prior to any possible visual transient in response to this target.

200

201 *Neuron selection.* All neural firing rates were measured during stimulus presentation, the  
202 memory epoch, and the perisaccadic epoch. To determine the ideal response epoch in which to  
203 measure tuning, we used a method described in Smith et al (2005) in which the variance  
204 (across the 40 conditions) was calculated for each neuron in a sliding window of 50 ms. For a  
205 neuron tuned to the spatial location of the visual stimulus or the saccade, the variance is largest  
206 when the window is aligned to the latency of the neuron (when it exhibits that tuning in the form  
207 of spatially variable responses). To isolate the visual and perisaccadic responses, we measured  
208 the latency of the visual response from 0 ms to 400 ms after stimulus onset for all neurons.

209 These outer boundary values were determined by visually examining the PSTHs of individual  
210 neurons and the population response. Similarly, the saccade response was measured 100 ms  
211 before to 50 ms after the saccade. Once the optimal window was identified for each neuron, we  
212 determined whether the neuron had significant ( $p < .01$ ) spatial tuning in that response window  
213 using a Kruskal-Wallis one-way analysis of variance on the average firing rates with location as  
214 the factor.

215

216 *Response field calculation.* The center of each neuron's response field during the visual and  
217 saccade epoch was calculated as follows. For each stimulus location, activity during the time  
218 epoch desired (visual, saccade, or across the delay in a sliding window analysis) was baseline-  
219 corrected by subtracting the average activity across all conditions (since they were the same  
220 prior to stimulus onset) from 30 ms to 180 ms after fixation was established (170 ms to 20 ms  
221 before stimulus onset). The resulting baseline subtracted activity was averaged across the trial

222 repeats for each condition, and then linearly interpolated to obtain a map with a resolution of  
223  $0.25^\circ \times 0.25^\circ$ . This map was smoothed using a gaussian filter with a standard deviation of  $1^\circ$ .  
224 The center of the response field was defined as the center of mass for all locations with  
225 responses  $\geq 75\%$  of the maximum for a given response field map (Zirnsak et al 2014). Only  
226 responses above baseline (as opposed to responses suppressed below baseline) were  
227 considered for the center of mass calculation. All response field spatial maps are displayed such  
228 that the left side of each image corresponded to the contralateral visual hemifield. This required  
229 reflecting the spatial response maps for Monkey Wa (where recordings were made from an  
230 array implanted in left 8Ar), so that data from both monkeys were displayed with the same  
231 coordinate frame.

232  
233 *Visual/motor index calculation.* To understand how neurons in each population responded to the  
234 visual stimulus relative to the saccade, a visuomotor index (VMI) was calculated using the  
235 formula below (Bruce & Goldberg 1985, Lawrence et al 2005, Sato & Schall 2003, Sommer &  
236 Wurtz 2000):

237 
$$VMI = \frac{V - M}{V + M}$$

238  
239 Where  $V$  is the response in the visual window and  $M$  is the response in the saccade window,  
240 with no baseline subtraction. Therefore, a VMI corresponding to 1 indicates a response  
241 exclusively for the visual stimulus, -1 exclusively for the saccade, and 0 indicates equal  
242 responses for the visual stimulus and saccade. For FEF, VMI was calculated individually for the  
243 8 conditions and then averaged across conditions to produce a single VMI value per neuron.  
244 For 8Ar, a subset of conditions (8 of the 40 conditions at a single amplitude) which most closely

245 approximated the amplitude and direction of the FEF stimuli were selected to facilitate  
246 comparison between the two areas.  
247  
248 *Cross-temporal decoding analysis.* A Poisson Naïve Bayesian decoder was implemented to  
249 determine the working memory signal readout of 8Ar and FEF populations. For both regions, a  
250 pseudo-population was created by combining neurons across recording sessions. Trial to trial  
251 dependencies within a session were removed by shuffling the order of the repeats. Any  
252 recording session with less than 40 repeats of each condition (1 session for FEF, 4 sessions for  
253 8Ar), and any units that did not have an SNR greater than 2.5 or fire at least 1 spike per second  
254 during the delay period of at least one condition were omitted (leading to the removal of 93 FEF  
255 units and 561 8Ar units). The instantaneous firing rate of each neuron (100 ms overlapping  
256 windows stepped by 50 ms) was used to build a decoder to predict the 8 saccade directions in  
257 FEF, and the 8 saccade directions closest in amplitude to the FEF saccade directions for 8Ar (8  
258 of the 40 conditions). The training data set contained 80% of the trials, creating a Poisson  
259 distribution model for each direction ( $\theta$ ) using the average spike count for each unit ( $n_{\text{spike}}$ ) in the  
260 time epoch specified. The remaining 20% of trials were used for testing, at time windows  
261 beginning at fixation and ending after the saccade. For a given test trial, the direction with the  
262 maximum prediction probability,  $P(\theta | n_{\text{spike}})$ , was defined as the predicted saccade direction.  
263  $P(n_{\text{spike}} | \theta)$ , was calculated using the Poisson distribution model that resulted from the training  
264 data. We used 5-fold cross validation, rotating the training and testing data such that each trial  
265 was used once for testing, with the average decoding accuracy computed across folds.

266

$$P(\theta | n_{\text{spike}}) = \frac{P(n_{\text{spike}} | \theta) * P(\theta)}{P(n_{\text{spike}})}$$

267 *Comparison of decoding between 8Ar and FEF.* To compare overall decoding accuracy  
268 between FEF and 8Ar, we randomly selected a single set of 8Ar neurons (770 neurons) from  
269 the total 8Ar population (1722 neurons) to match the size of the recorded population in FEF.  
270 When comparing decoding accuracy as a function of other properties (number of neurons,  
271 directional selectivity, and reliability) we used the training and testing time point that had the  
272 highest accuracy for each area during the delay period (FEF: 50 ms to 150 ms after stimulus  
273 offset, 8Ar: 100 ms to 200 ms after stimulus offset).

274

275 *Decoding accuracy and reliability.* We developed an index of the reliability of a neuron by  
276 calculating a tuning curve separately for the even and odd trials in the time bin with the highest  
277 decoding accuracy (see *Methods* above). The reliability was calculated as the Pearson  
278 correlation coefficient of the even and odd trial tuning curves. A neuron with an identical tuning  
279 curve on even and odd trials would have a reliability of 1, while a neuron in which the tuning  
280 curves on the even and odd trials were independent would have a reliability of 0 (on average).  
281 Reliability values less than 0 could occur by chance, but would not be expected on average  
282 because it would require the tuning curve to shift systematically in preferred direction between  
283 the even and odd trials. Each neuron in the pseudo-population was then sorted according to  
284 their reliability. Subpopulations of 100 neurons were used to decode eye movement direction,  
285 starting with the 100 neurons with the highest reliability, then the next 100 ranked neurons in  
286 non-overlapping bins until the remaining population did not have 100 neurons. For the FEF  
287 population, this resulted in 7 bins (ranked neurons 1-100, 101-200, 201-300, 301-400, 401-500,  
288 and 501-600, and 601-700). For the 8Ar population, the number of 100-neuron bins was larger  
289 due to the larger number of 8Ar neurons recorded.

290

291 *Decoding accuracy and tuning selectivity.* The selectivity of each 8Ar and FEF neuron was  
292 computed during the time window of maximum decoding accuracy (see *Comparison of*  
293 *decoding between 8Ar and FEF*) using a normalized vector strength metric (Smith et al 2002).  
294 To measure the selectivity of each neuron's tuning curve, we calculated the complex summed  
295 response vector (where  $i = \sqrt{-1}$ )

$$296 \quad v = \sum_{n=1}^N R_n e^{i2\theta_n}$$

297 Where  $R_n$  is the response magnitude during the delay period,  $\theta_n$  is the stimulus location, and  $n$   
298 is an index from 1 to the number of points, 8, in the tuning curve. This was then normalized by  
299 the summed magnitude of all the response vectors:

$$300 \quad selectivity = \frac{|v|}{\sum_{n=1}^N |R_n|}$$

301 A selectivity of 0 corresponded to a neuron that fired for all conditions equally while a value of 1  
302 indicated a neuron that responded exclusively to one condition. We ranked and grouped  
303 neurons based on their selectivity for the decoding analysis in the same manner described  
304 above for the reliability analysis.

305

## 306 **Results**

307 We recorded from 2511 8Ar neurons across 39 sessions and 889 FEF neurons across  
308 50 sessions (see *Methods*) in four macaque monkeys while the animals performed a memory  
309 guided saccade task (Figure 1B). We sought to understand the principles by which visual and  
310 motor signals align and evolve over time during sensorimotor integration. By comparing two  
311 brain regions, one closer to the motor output and one further (Leichnetz & Goldberg 1988,  
312 Segraves & Goldberg 1987, Sommer & Wurtz 2000), we were able to directly compare the

313 strength and alignment of visual and motor signals from the appearance of a visual stimulus to  
314 the execution of a saccade.

315

### 316 *Spatial constancy in 8Ar single neurons*

317 To understand how visual and motor signals are processed at the population level in  
318 8Ar, we first wanted to ensure robust responses were observed at the single neuron level.  
319 Previous studies examined visual (Funahashi et al 1989) and motor (Funahashi et al 1991)  
320 responses in 8Ar during an oculomotor task, reporting a wide variety of response properties  
321 including significant tuning for the visual, delay, and/or saccade epochs, ipsilateral and  
322 contralateral tuning, and both excitation and suppression in delay period activity. Having visual  
323 stimuli and saccades of numerous amplitudes and directions allowed us to form detailed  
324 response fields in the visual and saccade epochs for all neurons recorded. In Figure 2, we show  
325 two example 8Ar neurons with large responses during the visual and saccade epochs. Of note,  
326 each neuron had a spatially defined area of high firing rate (red) that remained localized to the  
327 same region of retinotopic space between visual and saccade epoch – in other words, the  
328 tuning was aligned. We observed three key features of 8Ar neuronal responses that are evident  
329 in the examples in Figure 2: (1) neurons exhibited both excitation and suppression relative to  
330 their baseline rate (particularly evident in Figure 2B), and regions of peak suppression tended to  
331 be located 180 degrees away from regions of peak excitation, (2) neurons typically were tuned  
332 in their responses smoothly across the whole tested visual field, as opposed to the punctate  
333 receptive fields characteristic of early visual cortex, and (3) excitatory response regions could be  
334 located either contralateral (Figure 2A) or ipsilateral (Figure 2B) to the recorded hemisphere.



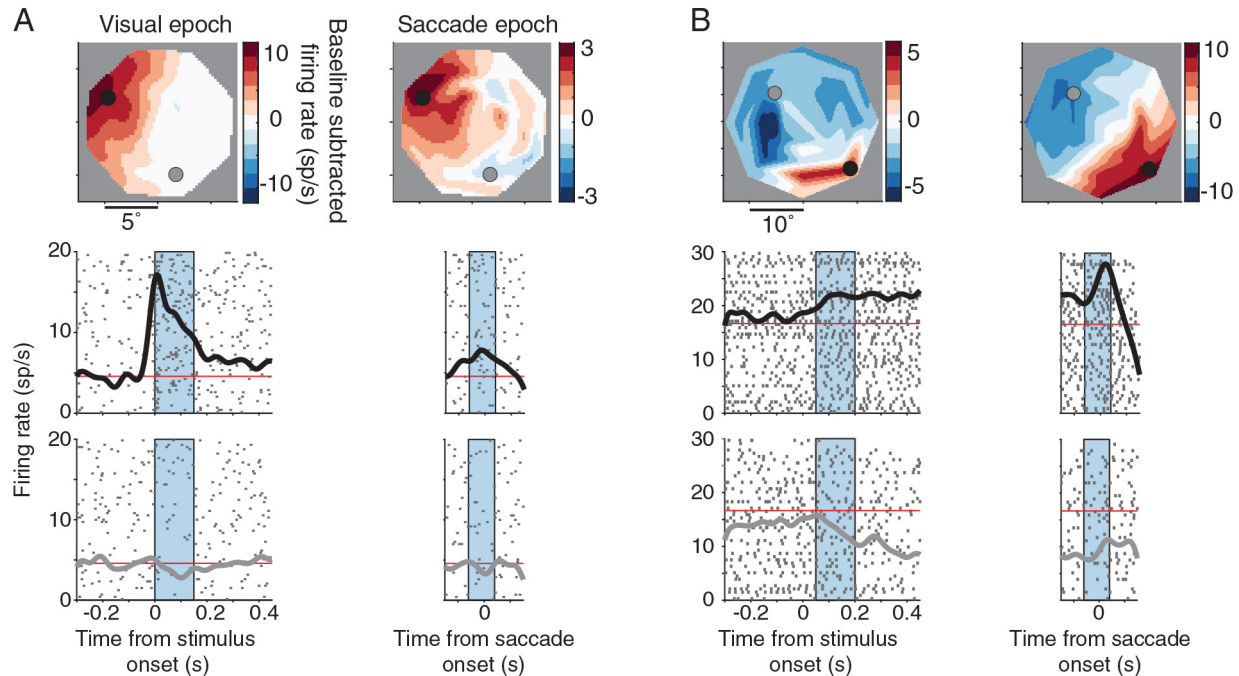

335

336 *Figure 2: Spatial constancy in 8Ar neurons.* A) Top: Response field map for an example neuron during the visual and  
 337 saccade epoch. Firing rate was baseline subtracted (170 ms to 20 ms before stimulus onset) such that red colors  
 338 indicate activity above baseline, blue colors activity below baseline, and white near baseline. Middle: PSTHs aligned to  
 339 stimulus onset and saccade onset for a condition close to the center of the response field (black circle). Bottom: PSTHs  
 340 aligned to stimulus onset and saccade onset for a condition in the opposite hemifield of the center of the response field  
 341 (gray circle). The blue shaded regions indicate the time period in which the firing rate was calculated during the visual  
 342 and saccadic epochs for the response field maps. This neuron had a robust visual and saccadic response that was  
 343 localized to the contralateral hemifield and was spatially congruent between the visual and saccade epoch. B) An  
 344 example neuron with a robust and spatially congruent visual and saccadic response localized to the lower portion of  
 345 the ipsilateral hemifield. Spatial locations opposite the center of the response field were suppressed below baseline.  
 346 Note: all response field maps were flipped such that the left hemifield represented the contralateral hemifield. Example  
 347 A was from monkey Wa and example B was from monkey Pe.

348

### 349 *Response latency in FEF and 8Ar*

350 Having confirmed that 8Ar neurons had distinct and spatially localized response fields in  
 351 both the visual and saccade epochs, we next identified the ideal time window to accurately  
 352 capture the visual and saccadic responses. Previous studies have demonstrated 8Ar visual  
 353 responses can have a variety of time courses (Mikami et al 1982, Suzuki & Azuma 1983):  
 354 transient bursts of excitation or suppression after stimulus onset or perisaccadically, sustained  
 355 modulation throughout the entire delay period, or a combination thereof. We first examined the  
 356 population PSTH aligned to the visual stimulus or saccade and measured the overall time

357 course of 8Ar activity. The 8Ar population had a small visual transient with a longer sustained  
358 period of activity during the delay period, which then rose perisaccadically and peaked after  
359 saccade onset (Figure 3A). This contrasted with the FEF population PSTH, which had a more  
360 phasic visual transient at a shorter latency, as well as perisaccadic activity that peaked closer to  
361 saccade onset (Figure 3B). To determine the latency of each neuron in response to a visual  
362 stimulus and relative to a saccade, we calculated the variance across the target conditions in 50  
363 ms windows (see *Methods*). To ensure a fair comparison between 8Ar and FEF latencies, the  
364 same window width and epoch times were used. For neurons with significant visual responses  
365 ( $p < .01$ , Kruskal-Wallis test), 8Ar had a significantly longer latency when compared to FEF  
366 (Figure 3C, 8Ar mean = 189 ms, FEF mean = 154 ms; two sample t-test  $p < .001$ ), consistent  
367 with our visual observations of the PSTHs in the two areas. Our estimate in FEF was later than  
368 other reports (such as (Mayo et al 2015, Schmolesky et al 1998), in part because our latency  
369 metric measures peak tuning and not response onset as in some other studies. This latency  
370 difference, combined with the visual comparison of the PSTHs, suggest a substantially more  
371 robust and earlier visual response in FEF than in 8Ar.

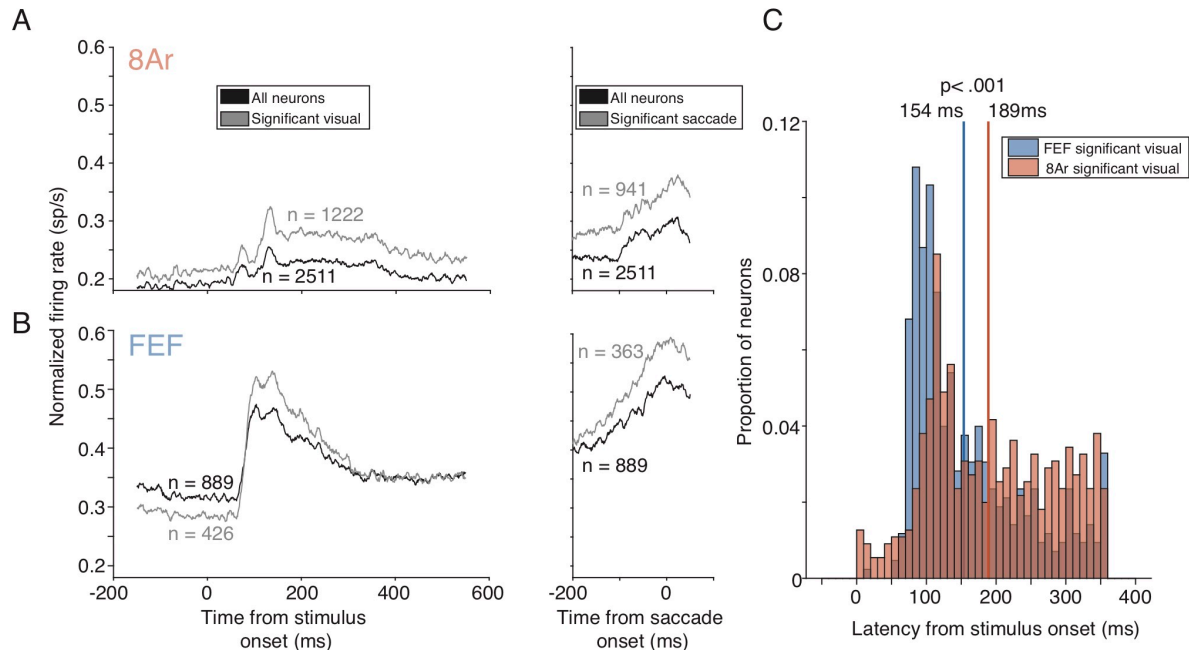

372

373 *Figure 3: Latency in 8Ar and FEF. A) Population PSTH for all 8Ar neurons (black line, n = 2511 neurons) and*  
 374 *significantly tuned 8Ar neurons (grey line;  $p < .001$  Kruskal Wallis test) in the visual (left) or saccade (right).*  
 375 *Significant visual neurons (n = 1222 neurons) passed the significance test in the visual epoch while significant*  
 376 *saccade neurons (n = 941 neurons) passed the test in the saccade epoch. Each neuron's PSTH was normalized by*  
 377 *the maximum firing rate in either the visual/delay epoch (0 ms to 550 ms after stimulus onset) or the saccade epoch (-*  
 378 *200 ms to 50 ms before saccade onset). B) Same convention as in A, but with all FEF neurons (black line; n = 889*  
 379 *neurons) and significantly tuned neurons (grey line) in the visual (n = 426 neurons) or saccade (n = 363 neurons)*  
 380 *epoch. The 8Ar population PSTH had less modulation with respect to baseline and a longer latency compared to FEF*  
 381 *in the visual and saccade epochs. C) Distribution of single neuron latencies for FEF (blue) and 8Ar (orange) during*  
 382 *the visual epoch. Only neurons with significant visual responses were included (8Ar = 1222 neurons; FEF = 426*  
 383 *neurons). The 8Ar distribution had a significantly longer visual latency compared to FEF ( $p < .001$ ; two sample t-test).*

384

### 385 Hemifield tuning differences in 8Ar

386 Previous 8Ar studies have found neurons tuned to stimuli in the ipsilateral visual field  
 387 (Funahashi et al 1989, Funahashi et al 1991), unlike most earlier visual areas which are entirely  
 388 contralateral or extend only minimally into the ipsilateral hemifield (Gattass et al 1981, Gattass  
 389 et al 1988). Our observations of individual example neurons (Figure 2) extend beyond a simple  
 390 classification of contralateral or ipsilateral – individual neurons demonstrated smoothly varying  
 391 responses across the whole tested visual field. We sought to determine whether this  
 392 observation in individual neurons was representative of the entire population, and then asked  
 393 how the ipsilateral and contralateral representations of space differ in 8Ar neurons.

394 We first defined a neuron as ipsilateral or contralateral based on the location of the  
395 center of mass calculated on the response that was elevated above baseline (the red region of  
396 the response maps, see *Methods*). For each group (ipsilateral and contralateral), we rotated the  
397 response field map of each neuron such that its center of mass was on the horizontal meridian.  
398 Ipsilateral and contralateral tuned neurons were then combined separately to form a population  
399 response field map for the visual epoch and the saccade epoch. For the contralateral tuned  
400 population, suppression in the opposite hemifield was more apparent in the saccade epoch  
401 compared to the visual epoch (Figure 4A). For the ipsilateral tuned population, suppression was  
402 equally present in both visual and saccade epochs (Figure 4B). The observation of stronger  
403 suppression in the ipsilateral tuned population compared to the contralateral tuned population  
404 during the visual epoch agrees with a previous finding (Bullock et al 2017).

405 We then investigated the contralaterally and ipsilaterally tuned population PSTHs  
406 aligned to stimulus and saccade onset. For the visual epoch, the ipsilateral tuned population  
407 had a later and weaker visual transient, coupled with a stronger sustained level of activity in the  
408 delay period after the visual transient (Figure 4C). During the saccade epoch the ipsilateral  
409 population began at a lower level of activity and increased more sharply perisaccadically.  
410 Comparing the visual latency distributions, ipsilateral neurons had significantly longer visual  
411 latencies ( $p < .001$ , two sample t-test) and had a more uniform distribution of latencies  
412 compared to the contralateral distribution, which had a clear peak around 187 ms (Figure 4D).

413

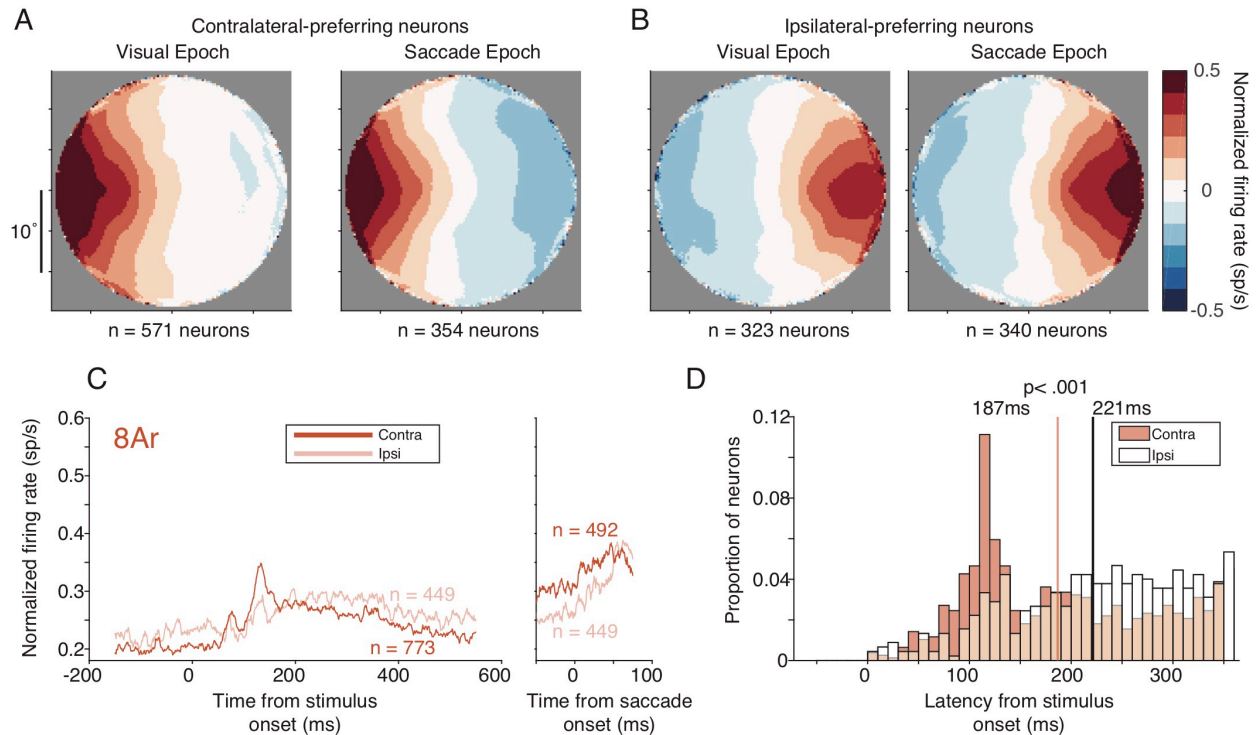

414

415 *Figure 4: Hemifield tuning differences in 8Ar. A) Population response field maps for contralateral tuned neurons in the*  
 416 *visual (left) and saccade (right) epoch. Each neuron's response field map was normalized by the maximum response*  
 417 *and rotated to the horizontal meridian. All normalized and rotated maps were then averaged across neurons to yield*  
 418 *the population response field map. B) same convention as in A but for the ipsilateral tuned neurons. The ipsilateral and*  
 419 *contralateral populations had similar suppression during the saccade epoch, however less suppression was observed*  
 420 *for the contralateral population during the visual epoch. C) Population PSTHs for contralateral (dark orange) and*  
 421 *ipsilateral (light orange) neurons aligned to stimulus onset or saccade onset. During the visual epoch, the ipsilateral*  
 422 *population PSTH had less modulation relative to baseline and a later latency than the contralateral population. During*  
 423 *the saccade epoch, the ipsilateral population PSTH had more modulation relative to baseline but still had a longer*  
 424 *latency. D) Distribution of latencies for contralateral (filled) and ipsilateral (open) neurons during the visual epoch. Only*  
 425 *neurons with significant visual responses were included (contralateral = 773 neurons; ipsilateral = 449 neurons). The*  
 426 *ipsilateral distribution had a significantly longer visual latency compared to the contralateral distribution ( $p < .001$ ; two*  
 427 *sample t-test).*

#### 428 *Dynamic selectivity in 8Ar*

429 So far, we have demonstrated 8Ar neurons had a wide variety of spatial tuning and  
 430 latencies across the visual and saccade epochs. Given this variety, we sought to understand  
 431 how these visual and motor signals coexisted within 8Ar. One particularly intriguing aspect of  
 432 dynamic selectivity in 8Ar, observed at the single neuron level, is an alteration of the spatial  
 433 response preferences during the delay period of a working memory task, often referred to as  
 434 mixed selectivity (Parthasarathy et al 2017, Spaak et al 2017). However, typical investigations of  
 435 this property employed a limited set of conditions, displaying stimuli at only one eccentricity. Our

436 experimental paradigm tiled a substantially larger portion of visual space resulting in a more  
437 detailed estimate of each neuron's visual and saccadic response field. Using this high  
438 resolution, we sought to confirm the extent of dynamic selectivity across the population of 8Ar  
439 neurons and determine if there were systematic rules by which this representation evolved over  
440 the time period between the visual stimulus and the saccade.

441         We found that so-called mixed selectivity existed in a subset of 8Ar neurons, and  
442 comparing single neuron examples illuminated subtle differences in how individual neurons  
443 changed their tuning. For some neurons, the center of the response field shifted drastically  
444 between the visual and motor epochs, such as a 90-degree rotation (Figure 5A). For other  
445 neurons, the response field during the visual epoch broadened during the saccade epoch, such  
446 that stimuli that were suppressed during the visual epoch became regions of peak activity during  
447 the saccade epoch (Figure 5B). Finally, some neurons shifted the center of their response field  
448 180-degrees, where the area of maximum activity during the visual epoch was suppressed  
449 below baseline during the saccade epoch (Figure 5C). These results provide clear examples of  
450 single neurons shifting their tuning preferences between the visual and saccade epochs and  
451 highlight the diversity of spatial shifts observed across individual neurons.



452

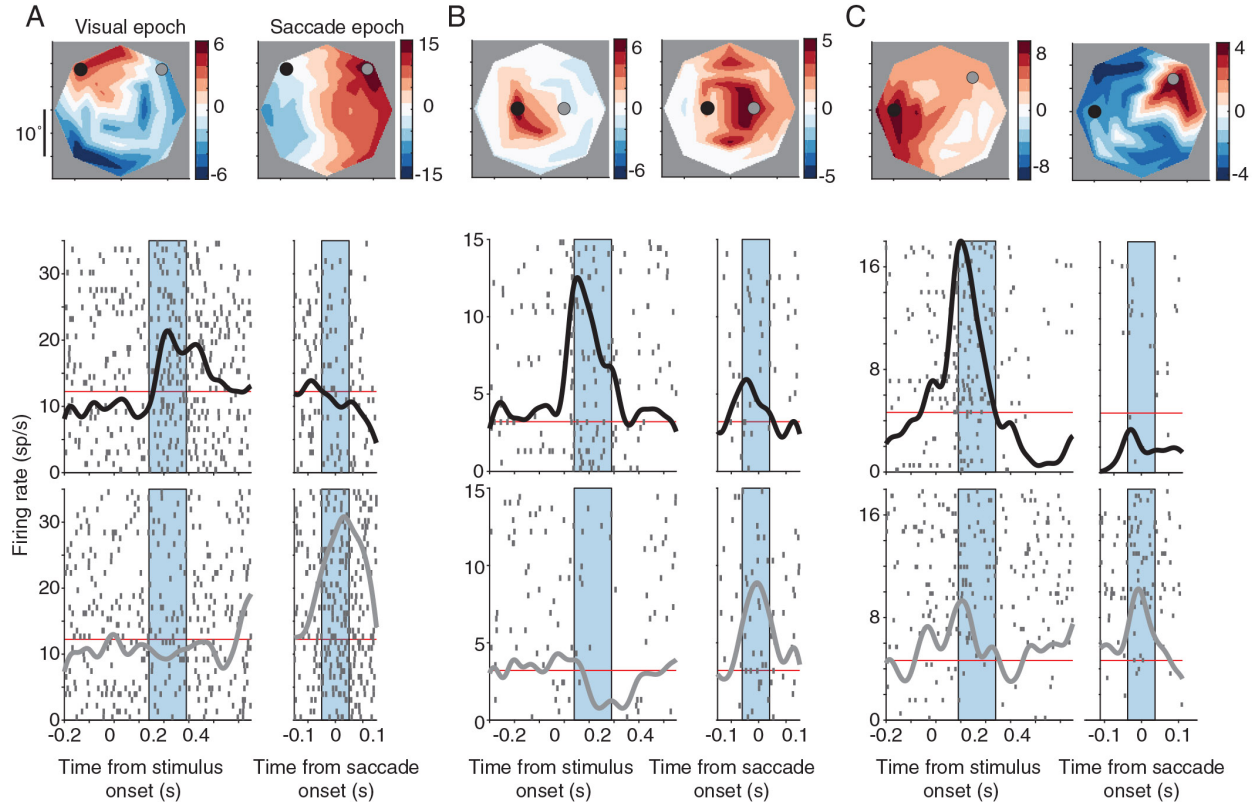

453

454 *Figure 5: Dynamic selectivity in single neurons. A) Top: response field map of the baseline subtracted firing rate for an example neuron. Bottom: Average PSTH for a condition close to the center of the visual response field (black) and*  
 455 *close to the center of the saccade response field (grey). This example neuron was contralaterally tuned during the*  
 456 *visual epoch but rotated its response field 90-degrees to the ipsilateral hemifield during the saccade epoch. B)*  
 457 *Example neuron with contralateral tuning during the visual epoch, with the ipsilateral hemifield suppressed. During*  
 458 *the saccade epoch, the response field broadened such that the neuron fired above baseline for the condition that was*  
 459 *previously suppressed. C) Example neuron with a robust visual response in the contralateral hemifield that is*  
 460 *suppressed during the saccade epoch. The response field shifted nearly 180-degrees between the visual and*  
 461 *saccade epochs. Examples A and B were from monkey Pe, example C from monkey Wa.*  
 462

463

The previous examples of mixed selectivity compared the tuning of individual neurons in specific windows during the visual and saccade epochs. If the visual stimulus and saccade signals are indeed separately coded in 8Ar, and the switch from a visual to a saccadic code accounted for much of the diversity seen in the 8Ar neuronal response, we hypothesized the maximum difference in the response field of the visual and saccade epochs should occur between the peak of the visual response and the onset of the saccade. To determine whether this was the case, we calculated the center of the response field in 50 ms windows throughout the entire trial (fixation onset to saccade onset). To understand how the center of the response

470

471 field shifted over the course of the trial, we subtracted the angle associated with the center of  
472 the response field in the ideal visual epoch window (see *Methods*) from the angle associated  
473 with the center of the response field calculated in sliding windows throughout the trial. If a  
474 neuron maintained the spatial location of its visual response field throughout the entire trial,  
475 subtracting by the preferred location would yield an angular difference of 0 throughout the trial  
476 (Figure 6A, top). Conversely, if a neuron shifted its tuning during the saccade epoch, we would  
477 predict the angular difference to be low in the visual epoch (as it is close to the ideal visual time  
478 window) but increase as the time window approached the saccade (Figure 6A, bottom). The  
479 same process was repeated for the ideal saccade window, where the center of the response  
480 field throughout the trial was subtracted by the ideal saccade window. These angular difference  
481 curves throughout the trial were calculated for each neuron and then averaged across neurons  
482 to yield a population metric. We found the maximum angular difference between the center of  
483 mass at a given time in the trial and the ideal visual window corresponded to saccade onset,  
484 while the minimum angular difference was observed around the mean visual latency of the  
485 population (180ms after stimulus onset) (Figure 6B, left). Conversely, the maximum angular  
486 difference for the ideal saccade window was after stimulus onset, and the minimum angular  
487 difference was at saccade onset (Figure 6B, right). Thus, the spatial shifts in 8Ar neurons were  
488 most obvious when comparing the visual and saccade-aligned responses.

489 Large shifts in the center of the response field could be confounded by neurons that did  
490 not fire in the other epoch, thus creating a noisy estimate of the center of the response field. To  
491 address this, we selected 8Ar neurons which were tuned both to the location of the visual  
492 stimulus as well as the saccade. We found those neurons in the population which had  
493 significant tuning (Kruskal Wallis test,  $p < .001$ ) in at least 50% of the time points following the  
494 visual stimulus (50 ms to 350 ms after stimulus onset) and preceding the saccade (-100 ms to 0  
495 ms before saccade onset). The rationale was these neurons maintained their tuning in the visual



496 and saccade epochs, and thus any shifts in tuning were not due to neurons that had a strong  
497 spatial preference in one epoch but weak or noisy responses in the other. Within this  
498 subpopulation, the same angular difference trends were maintained (Figure 6C). In summary,  
499 the maximum shift in response fields occurred between the visual and saccade epochs and this  
500 shift was not confounded by neurons that were untuned in either of the epochs. This is  
501 consistent with the hypothesis that some of the rich dynamics observed in 8Ar emerge due to a  
502 transition between separate visual and motor representations in the population.  
503

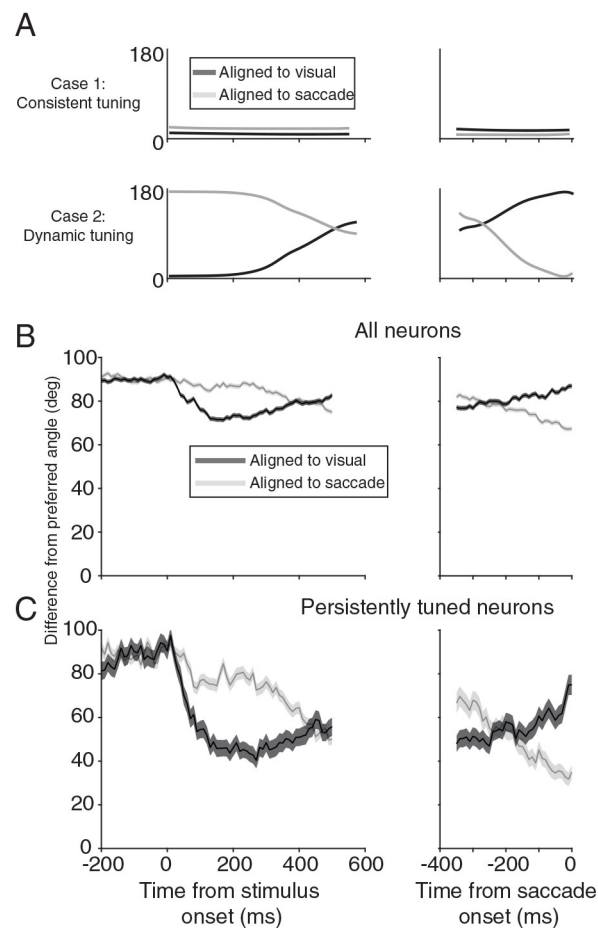

504

505 *Figure 6: Time course of visual and motor selectivity. A) Illustration of the angular difference expected throughout the*  
506 *time course of the trial for an idealized neuron with consistent tuning (top) and dynamic tuning (bottom) between the*  
507 *visual and saccade epochs (with a zero-latency visual response). B) Angular difference for all 8Ar neurons (n = 2511*  
508 *neurons) between the center of the response field at a specific time during the trial and the center of the response field*  
509 *for the ideal latency in the visual (black) or saccade (grey) epoch aligned to stimulus (left) or saccade (right) onset. C)*  
510 *same convention as in B however only for a subpopulation of neurons that had persistent significant tuning during the*

511 *visual and saccade epochs (n = 158 neurons). The time during the trial at which the response field center was furthest*  
512 *from the response field calculated during the ideal visual latency was saccade onset. Conversely, the time during the*  
513 *trial at which the response field center was furthest from the response field calculated during the ideal saccade latency*  
514 *was in the 200ms following stimulus onset.*

515

#### 516 *Comparison between FEF and 8Ar*

517       Based on the results presented up to this point, it is clear a subpopulation of 8Ar  
518 neurons altered their tuning between the visual and saccade epochs even though the visual  
519 stimulus and saccade endpoint were at the same spatial location. Furthermore, this was not  
520 simply due to a loss of tuning during one of the epochs. If mixed selectivity occurred in 8Ar, a  
521 natural first step would be to determine whether this property was unique to a subpopulation of  
522 8Ar neurons, such as the ipsilateral neurons that we found had longer response latencies and  
523 different patterns of suppression opposite the response field. In addition, we considered whether  
524 other cortical regions exhibited similar changes in tuning, or whether this property was unique to  
525 8Ar. To determine the relative prominence of neurons with shifting tuning in 8Ar, we compared  
526 our observations at a population level with FEF. Given FEF is more closely linked to the  
527 generation of saccades, we hypothesized more FEF neurons would have a congruent alignment  
528 of their visual and motor signals compared to 8Ar.

529       We first asked whether there was any pattern to how 8Ar neurons shifted their response  
530 profiles between the visual and saccade-related responses. To do this, we included only  
531 neurons that were selective in both the visual and saccade epochs ( $p < .001$ ; Kruskal Wallis  
532 Test; Contra:  $n = 412$  neurons; Ipsi:  $n = 217$  neurons). We then computed the angular difference  
533 between the center of the response field in the ideal visual and saccade epoch and binned  
534 these angular differences in six  $30^\circ$  bins. We compared the distribution of these visual-motor  
535 angular differences to a null distribution obtained by associating each neuron's preferred visual  
536 response angle with the preferred saccadic response angle of a different neuron. We repeated  
537 this process 1000 times to obtain the 5<sup>th</sup> and 95<sup>th</sup> confidence intervals for each  $30^\circ$  bin. For both

538 the contralateral and ipsilateral populations in 8Ar, we found that roughly half of the neurons had  
539 visual and saccadic peak response angles within 60° (Figure 7A). Of the remaining neurons,  
540 there was a tendency for a mirror inversion (> 120° shift) more often than an intermediate  
541 rotation (60-120°).

542 To compare the shifts we observed in 8Ar with a baseline from an area that has been  
543 studied extensively in visuomotor tasks, we matched our data in the two areas across conditions  
544 and trial repeats (see *Methods*). This meant a subset of the 8Ar data were used (1 target  
545 amplitude, 8 directions), and all FEF and 8Ar sessions were randomly subsampled to 40 trial  
546 repeats per condition. The same method for calculating latency was used on this subsampled  
547 data from both areas to calculate the ideal visual and saccade response window and to identify  
548 significantly tuned neurons ( $p < .001$ ; Kruskal Wallis test; FEF  $n = 251$  neurons, 8Ar  $n = 152$   
549 neurons). Our results in 8Ar with this reduced data set were similar to those obtained in the full  
550 40-condition data (Figure 7B). As a population, FEF had a greater proportion of well-aligned  
551 neurons (< 30° angular difference) than 8Ar (8Ar = 32%; FEF = 48%;  $p = .0014$ , Chi-square  
552 test). However, both areas contained a subset of neurons that reliably shifted their tuning  
553 between the visual and saccadic epochs.

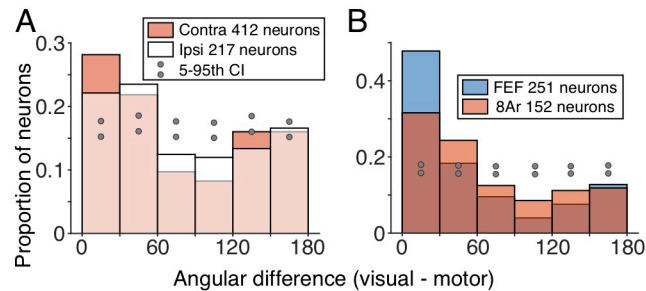

554

555 *Figure 7: Tuning shifts in 8Ar and FEF subpopulations. A) Shifts in response field centers between the visual and*  
556 *saccade epoch as measured by angular difference for contralateral (filled) and ipsilateral (open) tuned neurons. Only*  
557 *neurons with significant visual and saccade responses were analyzed ( $p < .01$ , Kruskal Wallis Test; Contra  $n = 412$ ;*  
558 *Ipsi  $n = 217$ ). 5<sup>th</sup> and 95<sup>th</sup> percent confidence intervals show the proportion of neurons expected for a given angular*  
559 *difference by chance (upper and lower grey dots). Contralateral and ipsilateral populations had similar distributions*  
560 *with respect to angular difference. Many neurons had consistent visual and saccade alignment, however a substantial*  
561 *portion also shifted their tuning dramatically. B) same conventions as in A but comparing the FEF population to the*  
562 *8Ar population. Some FEF neurons had substantial shifts in tuning, equivalent to the 8Ar population, however FEF*  
563 *also had more neurons with congruent visual and motor response fields.*

564

565 *Visual and motor response properties in FEF and 8Ar*

566 In addition to the spatial response profile, we sought to compare the relative strength of  
567 visual and motor signals in 8Ar and FEF by computing a visuomotor index (VMI, see *Methods*)  
568 across conditions for each neuron in the FEF and 8Ar populations. Broadly, these distributions  
569 were quite similar in the two regions – most neurons exhibited some degree of visual and  
570 saccadic responses, leading to distributions centered on zero. However, relative to the FEF  
571 distribution, 8Ar was significantly ( $p = .003$ ; two sample t-test) shifted toward 1, meaning 8Ar  
572 neurons were more likely to have a stronger visual response compared to a saccade response  
573 (Figure 8A). In addition to this difference in the ratio of visual and saccadic responses, FEF had  
574 a larger proportion of significantly tuned neurons ( $p < .001$  in the visual, motor, or both epochs;  
575 Kruskal Wallis test) in visual, visuomotor, and motor groups (chi squared test; visual:  $p = .01$ ;  
576 motor:  $p = .007$ ; visuomotor:  $p < .001$ ) (Figure 8B). When combining the three groups (tuned  
577 visual, motor, and visuomotor) FEF also had a significantly higher proportion of contralaterally  
578 tuned neurons (chi squared test,  $p = .002$ ; FEF 68% contra, 8Ar 59% contra). The presence of  
579 more ipsilateral tuned neurons in 8Ar was even more striking when considering only the most  
580 directionally selective (see *Methods*) neurons in each population (Figure 8C). To obtain these  
581 selective neurons for a given visual/motor/visuomotor group, a neuron had to be significantly  
582 tuned ( $p < .001$ ; Kruskal Wallis test in one or both of the visual and saccadic epochs) as well as  
583 have a directional selectivity (see *Methods*) that was at or above the 90<sup>th</sup> percentile for the  
584 epoch. For most of the groups in both 8Ar and FEF, selective neurons had a strong contralateral  
585 bias (FEF contralateral: visual 82%, motor 71%, visuomotor 79%; 8Ar contralateral: visual 79%,  
586 motor 30%, visuomotor 71%). In FEF, this result is consistent with a previous study by our  
587 group that found almost exclusively contralateral RFs in a population of neurons with brisk  
588 visual responses to a dynamic dot stimulus (Mayo et al 2015). Interestingly, when considering

589 only these selective neurons, the 8Ar motor population had more ipsilateral than contralateral  
590 neurons. Upon visual inspection of these ipsilateral tuned motor neurons, we noted many of  
591 them had drastic shifts in their spatial responses between the visual and motor epochs, with  
592 contralateral tuned visual responses (that did not pass the significance test for tuning in the  
593 visual epoch). Overall, these results indicate that FEF neurons are more strongly tuned, and  
594 more contralaterally biased, than 8Ar neurons, which have a more balanced representation of  
595 space that also appears more likely to shift between the visual and motor epochs.

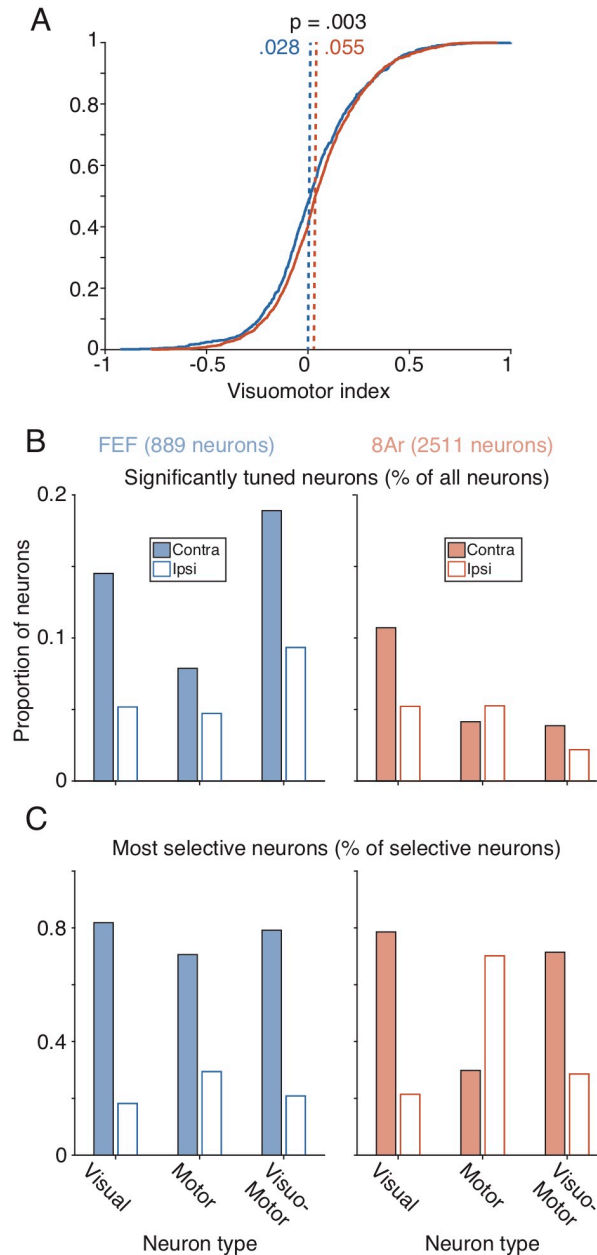

596

597 *Figure 8: Visual/motor tuning in 8Ar and FEF. A) Cumulative distribution of visuomotor index for 8Ar and FEF*  
 598 *populations, all neurons included (FEF  $n = 889$  neurons; 8Ar  $n = 2511$  neurons). 8Ar neurons had a stronger visual*  
 599 *response when compared to the saccadic response. B) Distribution of visual, motor, and visuomotor neurons within*  
 600 *FEF (left) and 8Ar (right), normalized to the total number of neurons recorded. Groups were divided by spatial tuning*  
 601 *(contralateral: filled, ipsilateral: open). To be included a neuron needed to have significant tuning in at least one epoch*  
 602 *or both (visuomotor group). FEF had more tuned neurons for all groups (visual, motor, visuomotor). C) Same convention*  
 603 *as in B, but with the additional criterion that each neuron had to be in the 90<sup>th</sup> percentile or above ranked by directional*  
 604 *selectivity (FEF: visual = 22, motor = 17, visuomotor = 24; 8Ar: visual = 70, motor = 57, visuomotor = 12). A majority of*  
 605 *the most selective FEF neurons had contralateral tuning, while in 8Ar, highly selective motor neurons were more likely*  
 606 *to be ipsilateral tuned.*

607

608

609 *Decoding from 8Ar and FEF populations*

610 Individual 8Ar neurons had numerous tendencies consistent with the mixed or dynamic  
611 selectivity observed by other groups during working memory tasks. One approach to quantify  
612 the effect of these changes in individual neurons is to apply decoding analyses to the whole  
613 population (Astrand et al 2014, Barak et al 2010, Parthasarathy et al 2017, Spaak et al 2017,  
614 Stokes et al 2013). An accumulation of tuning shifts across individual neurons would lead to a  
615 spatial representation that did not generalize well across time. In such a situation, a decoder  
616 built on data from one time point in the trial would do poorly in predicting target location at  
617 another time point. Our results with individual neuron analyses in 8Ar and FEF led us to predict  
618 that the population-level signal in FEF would be more temporally generalizable than that in 8Ar.

619 We used a Poisson Naïve Bayes decoder, trained on neural activity from one time  
620 window in the trial, and tested on all other time points during the trial (see *Methods*). We  
621 combined neurons across recording sessions to create a pseudo-population in FEF and 8Ar,  
622 using 8 conditions (1 amplitude, 8 directions) and, to normalize across sessions, 40 trial repeats  
623 randomly selected from each condition with the trial ordering shuffled for each neuron to destroy  
624 any correlations between neurons. All decoding accuracies reported were the average across  
625 the eight conditions, and standard errors were computed across cross-validation folds. For  
626 comparisons between FEF and 8Ar, the 8Ar pseudo-population was randomly subsampled to  
627 match the number of neurons in the FEF pseudo-population, unless stated otherwise.

628 Overall decoding performance, as well as generalizability across time, was higher in the  
629 FEF pseudo-population compared to 8Ar. For FEF, decoding was highest shortly after visual  
630 onset and around the time of the saccade, but also maintained a high accuracy throughout the  
631 delay period (Figure 9A). The generalizability of the FEF population code was seen by  
632 examining bins on the off-diagonal, where the training and testing epochs were temporally  
633 separated. The decoder trained using FEF activity was more generalizable when compared to

634 8Ar (Figure 9B). We took a cross-section of the decoding performance map and evaluated the  
635 testing accuracy across the trial when the training bin was held constant (Figure 9, inset line  
636 graphs). If activity in a given training bin was generalizable across time, the resulting accuracy  
637 curves would be broad, while non-generalizable activity would have a sharp peak corresponding  
638 to when the training and testing bins temporally aligned. The accuracy curves for 3 training bins  
639 throughout the delay period were higher and broader for FEF compared to 8Ar, suggesting the  
640 FEF population code had a more accurate readout of the stimulus/saccade encoded during a  
641 trial, and that the code was more generalizable throughout the trial.

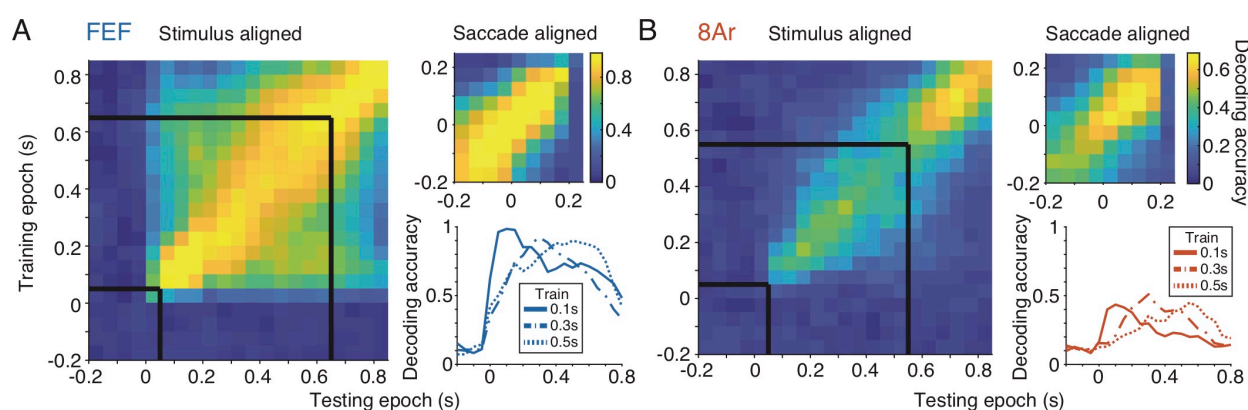

642  
643 *Figure 9: Decoding in 8Ar and FEF. A) Decoding performance of the FEF pseudo-population ( $n = 770$  neurons) for*  
644 *various training and testing points throughout the trial, aligned to stimulus onset or saccade onset (inset). Black lines*  
645 *denote the beginning and end of the delay epoch. B) same convention as in A, but with a 8Ar pseudo-population*  
646 *randomly subsampled to have the same size as the FEF pseudo-population ( $n = 770$  neurons of 1722 neurons). Inset)*  
647 *cross-sections of decoding accuracy, where the training bin was fixed to one of three points during the delay period*  
648 *(0.1, 0.3, or 0.5 seconds after stimulus offset) and the testing bins varied across the entire trial. Decoding accuracy was*  
649 *highest for training and testing points that were temporally in the same bin, particularly after stimulus onset and around*  
650 *the time of the saccade. FEF had a higher overall decoding accuracy and a higher accuracy for training and testing*  
651 *points that were temporally separated.*

652  
653 To understand why the FEF decoder performed better than the 8Ar decoder, we related  
654 decoding accuracy to three basic properties of the pseudo-population: the number of neurons in  
655 the population, the direction selectivity of the neurons, and their reliability in response (the  
656 correlation in tuning curves between even and odd trials, see *Methods*). For this analysis, one  
657 time point with the highest decoding accuracy after stimulus onset was selected for testing and



658 training (FEF: 100-150 ms after stimulus onset, 8Ar 150-200 ms after stimulus onset). We first  
659 examined decoding accuracy as a function of the number of neurons in the pseudo-population.  
660 Across all pseudo-population sizes, the FEF decoder performed better than the 8Ar decoder  
661 (Figure 10A). Starting with a population of 100 neurons, the FEF decoder increased in accuracy  
662 as more neurons were added and began to asymptote at 100% accuracy for populations over  
663 500 neurons. The 8Ar population started at an overall lower accuracy level and monotonically  
664 increased as more neurons were added, but the decoder never reached the accuracy of even  
665 the smallest population of FEF neurons we tested (FEF accuracy, 100 neurons 71.5%; 8Ar  
666 accuracy 1722 neurons 63.5%).

667         Knowing that a decoder trained on activity from a small population of FEF neurons (100  
668 neurons) could outperform one trained on the entire 8Ar population (1722 neurons) we  
669 examined what individual response properties could lead to such a wide margin in decoding.  
670 We first examined direction selectivity, a measure of tuning across the 8 conditions (see  
671 *Methods*). One possibility is that the neurons in FEF were merely more selective, and therefore  
672 the population of FEF neurons produced better decoding. For each pseudo-population (FEF and  
673 8Ar), each neuron was ranked by their selectivity. Then, nonoverlapping groups of 100 neurons  
674 were chosen starting with the most selective. Decoding accuracy increased with the directional  
675 selectivity of the neurons for both FEF and 8Ar. When we compared subpopulations where the  
676 average selectivity of the 100 neurons was the same, FEF decoding accuracy was still larger  
677 than 8Ar (Figure 10B). However, the much smaller difference in decoding between FEF and 8Ar  
678 in matched selectivity groups indicates that one reason for the better decoding in FEF was that  
679 FEF neurons were, on average, more selective than 8Ar.

680         We considered a second response property that could influence decoding, which was  
681 the reliability of the neurons from trial to trial for the same stimuli (see *Methods*). Using the same  
682 methodology as for selectivity, we ranked the neurons and measured decoding in groups of

683 100. As with selectivity, decoding accuracy increased with reliability for both FEF and 8Ar  
684 populations. In groups of neurons matched by their reliability, FEF decoding performance was  
685 closer to, yet still slightly exceeding 8Ar performance (Figure 10C). Taken together, these  
686 analyses show that the overall higher selectivity and reliability in FEF neurons are important  
687 contributors to the higher ability to decode from small populations in FEF compared to 8Ar.

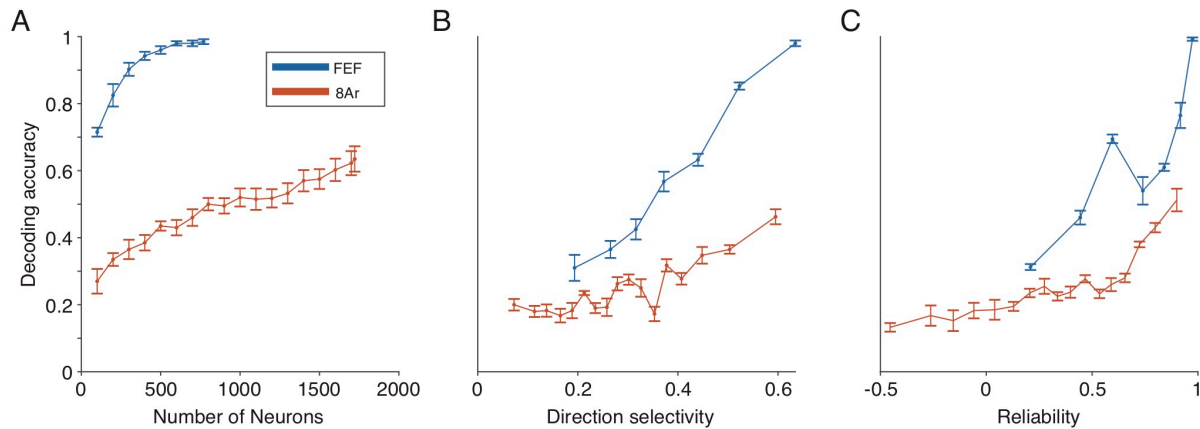

688

689 *Figure 10: Decoding accuracy with single neuron properties. A) Decoding accuracy in FEF (blue) and 8Ar (red) as a*  
690 *function of the size of the pseudo-population. Even the smallest FEF population tested (100 neurons) performed*  
691 *better than the entire sample of 8Ar neurons (1722 neurons). B) Decoding accuracy for groups of 100 neurons (non-*  
692 *overlapping) as a function of direction selectivity. For both FEF and 8Ar, as the mean direction selectivity of the*  
693 *population increased, the decoding accuracy increased. The difference in decoding accuracy between 8Ar and FEF*  
694 *neurons decreased when matched for direction selectivity, but the FEF populations still maintained a higher decoding*  
695 *accuracy. C) Same convention as in B but matched for reliability. Similar to the direction selectivity results, decoding*  
696 *accuracy increased as reliability increased, and the difference in decoding accuracy between FEF and 8Ar was*  
697 *reduced when matched for reliability, but the decoding performance in FEF remained higher than 8Ar.*

698

## 699 Discussion

700 The transition from perception of a visual stimulus to the generation of a saccadic eye  
701 movement is fundamental to primate behavior and has been an important model system for  
702 studying the broader process of sensorimotor integration. Using a memory guided saccade task  
703 that separates responses due to the visual stimulus from those associated with the eye  
704 movement, we studied the dynamics of high-resolution visual and motor representations in 8Ar  
705 and FEF. These two cortical regions have been implicated as important in sensorimotor  
706 transformations, particularly in the context of spatial working memory, with FEF situated closer

707 to the motor output, with its direct connections to the superior colliculus (Leichnetz et al 1981,  
708 Segraves & Goldberg 1987, Sommer & Wurtz 2000) and brain stem oculomotor nuclei (Huerta  
709 et al 1986, Leichnetz et al 1984), and 8Ar more removed (but see also Borra et al (2015)). We  
710 found 8Ar neurons display a rich set of response properties that were not frequently observed in  
711 FEF, suggesting an important distinction in how these two areas function during perception and  
712 action.

713

#### 714 *Visual field representation*

715 We found that 8Ar neurons in one hemisphere represent the entire visual field. This  
716 representation is achieved not only by an enhancement of activity above baseline (a more  
717 traditional receptive field), but also through spatially tuned suppression below baseline (an  
718 inversion of the traditional receptive field). These regions of excitation and suppression spanned  
719 both hemifields, such that a typical 8Ar neuron provided spatial information about the entire  
720 visual field rather than a small region typical of receptive fields in early visual cortex. Regions of  
721 excitation in 8Ar could be in either the contralateral or ipsilateral hemifield, with suppressive  
722 areas typically located directly opposite (by 180°). While nearby neurons in some cases had  
723 spatially similar receptive fields, we observed no distinct pattern of topographic organization  
724 across the electrode arrays (Figure 11). Taken together, these observations suggest a highly  
725 distributed representation of space in 8Ar.

726 In visual and oculomotor areas, neurons primarily represent the contralateral hemifield.  
727 This includes FEF (Bruce & Goldberg 1985, Mayo et al 2015), LIP (Ben Hamed et al 2001, Blatt  
728 et al 1990, Patel et al 2010), SC (Cynader & Berman 1972, Goldberg & Wurtz 1972, Schiller &  
729 Koerner 1971), and SEF (Schlag & Schlag-Rey 1987). Some cortical areas show evidence of  
730 ipsilateral tuning, such as MT (Gattass & Gross 1981, Van Essen et al 1981), FST (Desimone &  
731 Ungerleider 1986), LIP (Dunn & Colby 2010), SEF (Schall 1991, Schlag & Schlag-Rey 1987),

732 and IT (Ungerleider 1983), although ipsilateral responses in these areas are typically confined to  
733 regions of space that are just across the vertical meridian. Our findings of ipsilateral tuning are  
734 consistent with earlier reports in 8Ar of visual, delay, and saccadic responses (Funahashi et al  
735 1989, Funahashi et al 1990, Funahashi et al 1991, Mikami et al 1982, Suzuki & Azuma 1983).  
736 Some previous studies in 8Ar have identified neurons that are suppressed below baseline,  
737 primarily opposite the receptive field (Bullock et al 2017, Kiani et al 2015), as well as a medial-  
738 lateral topography for visual eccentricity (Suzuki & Azuma 1983) that mirrors that in FEF (Bruce  
739 et al 1985). We did not observe a strong topography in our recordings, but did observe local  
740 clustering consistent with a previous report (Leavitt et al 2017), evident from our observation of  
741 nearby neurons with similar RFs (Figure 11, dashed purple outline). It is likely that some of the  
742 variability in previous observations of topography within 8Ar is due to sparse spatial mapping in  
743 concert with the rich spatial structure of excitation and suppression.  
744

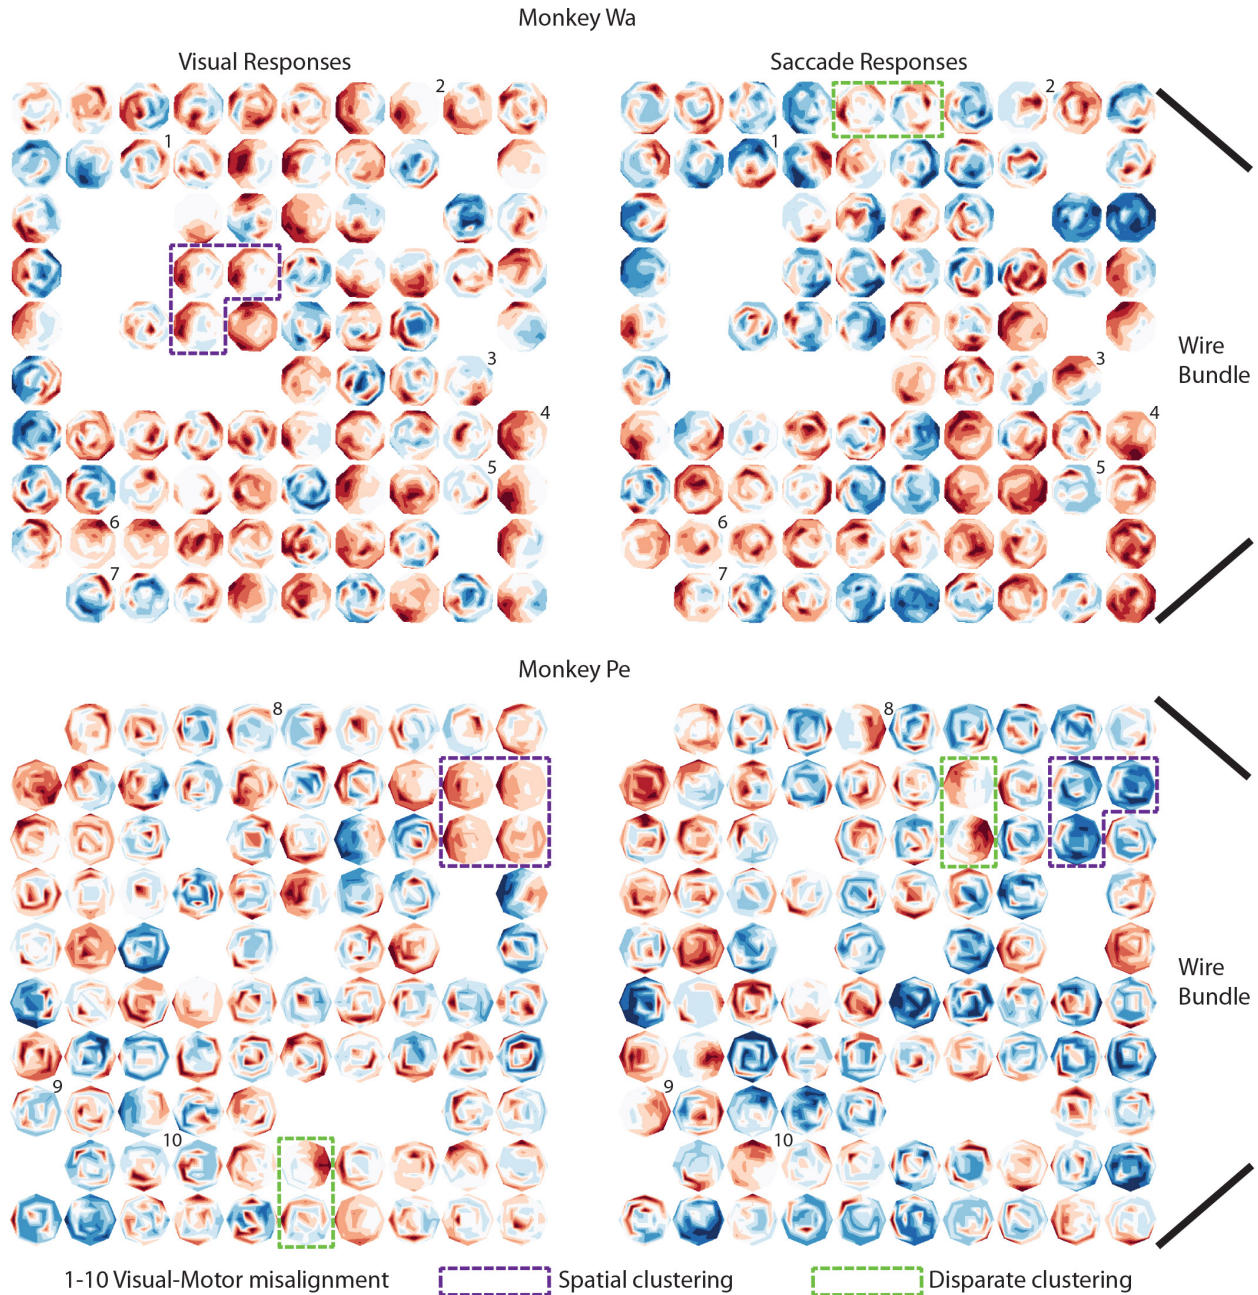

745

746 *Figure 11: Topography of visual and motor responses in 8Ar. Response field maps for one example session in monkey Wa (top)*  
 747 *and Pe (bottom) during the visual (left) and saccade (right) epochs. As with previous response field maps, red colors*  
 748 *corresponded to activity above baseline, blue below baseline, and white near baseline. The spatial location of each neuron*  
 749 *corresponds to its position on the electrode array. The arrays are oriented with the wire bundle coming from the right side of the*  
 750 *figure (refer to Figure 1 for the orientation with respect to the brain). Very roughly, the bottom right of the arrays in these*  
 751 *figures were most anterior, with the top right being medial. If multiple neurons happened to be recorded on the same electrode,*  
 752 *the neuron with largest modulation depth (maximum firing rate – minimum firing rate) was used. Colored boxes highlight*  
 753 *illustrative examples of neurons located physically near each other (i.e., recorded with adjacent electrodes) with the same tuning*  
 754 *(purple) or disparate tuning (green). Black numbers identify neurons with mixed selectivity between the visual and motor*  
 755 *epochs.*

756



757 *Transition from visual to motor responses in 8Ar and FEF*

758           Our comparison of 8Ar and FEF, from the presentation of a visual stimulus to the  
759 execution of an eye movement, revealed key differences in the properties of these two cortical  
760 regions that are highly interconnected (Huerta et al 1987, Stanton et al 1993, Stanton et al  
761 1995). Visual latencies for 8Ar neurons were slower on average with a broader range than FEF,  
762 and the tuning across the population was weaker in all groups (visual, motor, visuomotor)  
763 compared to FEF. This led to lower overall decoding accuracy in 8Ar compared to FEF, due to  
764 the relatively poorer direction selectivity and reliability of 8Ar neurons. Importantly, we observed  
765 many 8Ar neurons changed their tuning between the visual and motor epochs, with a  
766 sometimes striking misalignment between their preferences in these two periods of time that  
767 was revealed by the dense spatial mapping protocol we employed. These results in 8Ar are  
768 consistent with a transition from visual to motor representations that are instantiated with a  
769 different mixture of neurons and activity. Evidence for a similar misalignment in preferences has  
770 been previously reported in both FEF (Sajad et al 2015, Sajad et al 2016) and SC (Sadeh et al  
771 2015) neurons in head unrestrained monkeys, where visual and movement responses most  
772 strongly encode target and gaze, respectively. Our findings reflect an even more fundamental  
773 misalignment between visual and motor target signals in some neurons.

774           The alignment of visual and motor signals in a neuronal population could be beneficial in  
775 areas close to the motor output, as a direct mapping provides an efficient means for processing  
776 information and generating a rapid movement. This circuitry seems to be implemented in SC,  
777 where visual and movement activity is spatially aligned (Wurtz & Goldberg 1972). Given the  
778 strong, topographic descending projections from FEF to SC (Stanton et al 1988), and the  
779 observation that microstimulation in FEF elicits saccades at very low currents (Bruce et al  
780 1985), such an alignment might also be expected in FEF. Indeed, when comparing FEF to 8Ar,  
781 visual and motor signals were more aligned in FEF. Why might different strategies be

782 implemented in neighboring cortical regions that share involvement in important visuomotor  
783 behavior? Despite their proximity and interarea connectivity profile, lesions to FEF and 8Ar have  
784 resulted in differentiable deficits. In an anti-saccade task, for example, lesions in adjacent area  
785 46 of PFC result in an increased percentage of errors (Pierrot-Deseilligny et al 1991, Ploner et  
786 al 2005) while in FEF there is an unchanged error rate but an increased saccade latency  
787 (Fukushima et al 1994). Another study which directly compared 8Ar and FEF during a distractor  
788 task, found the FEF code was more generalizable (in agreement with our findings), and that the  
789 8Ar code morphs to account for the distractor and still preserve information about the stimulus  
790 (Parthasarathy et al 2017). A comparison of 8Ar with lateral intraparietal cortex (LIP), an  
791 oculomotor region strongly connected with FEF (Barbas & Mesulam 1981, Ferraina et al 2002,  
792 Medalla & Barbas 2006), found relatively stable decoding of LIP activity over time and a more  
793 dynamic 8Ar code that was more robust in the presence of distractors (Meyers et al 2018). Our  
794 observations of the tuning properties of these two regions, and their differing alignment between  
795 visual and motor codes, are consistent with 8Ar playing an important role in more flexible (and  
796 less reflexive) visuomotor behaviors. One possible advantage of misalignment between the  
797 code for a visual stimulus and for the execution of an eye movement could be to avoid one  
798 signal contaminating the other, enabling an animal to resist moving its eyes to the location of a  
799 salient visual stimulus.

800

#### 801 *Interpretation of dynamic selectivity & implications for working memory models*

802 The first studies investigating the neural correlates of working memory in PFC observed  
803 elevated spiking during the memory or delay period (persistent activity), and concluded this was  
804 the source of the working memory signal (Fuster & Alexander 1971, Kubota & Niki 1971).  
805 However, later work demonstrated many PFC neurons were transiently activated (Romo et al  
806 1999, Warden & Miller 2007, Zaksas & Pasternak 2006) and at the population level, the code

807 appeared to be not persistent, but dynamic (Barak et al 2010, Meyers et al 2008, Stokes et al  
808 2013). This body of work has contributed to a vigorous debate on how working memory is  
809 represented in cortex, with some supporting a persistent model (Constantinidis et al 2018) and  
810 others a dynamic model (Lundqvist et al 2018). While both groups agree activity during the  
811 memory epoch is important and that there exists dynamic tuning at the level of single neurons,  
812 they differ in what aspects of the activity are proposed to underlie the working memory signal.  
813 One model suggests the working memory signal lies in a stable subspace, permitting a fixed  
814 population readout despite the dynamics of individual neurons (Murray et al 2017). Others  
815 suggest the dynamics are how the memory is encoded, either through an “activity silent”  
816 mechanism (Stokes 2015) or through sparse coordinated spiking facilitated by oscillations in  
817 local networks (Lundqvist et al 2016).

818         Our study remains agnostic to which is the appropriate model for working memory, and  
819 instead focuses on potential origins of dynamic delay activity in individual neurons and  
820 populations. We found that much of the dynamic evolution of activity in 8Ar could be explained  
821 by the transition between representations of perceptual input and motor output that involve  
822 different mixtures of neurons in the population. That is, the dynamics we observed were not  
823 random fluctuations in the activity of individual neurons during the delay period, but rather the  
824 transition between two separate spatial tuning functions for visual input and motor output. This  
825 suggests the 8Ar code is stable but dynamic, a similar interpretation to Spaak et al (2017).  
826 Because lateral PFC as a whole has been implicated in a wide range of sensory and cognitive  
827 behavior (Tanji & Hoshi 2008), this leads to the speculation that apparent dynamics in 8Ar may  
828 be explained by other task variables for which individual neurons are tuned, such as differing  
829 sensory input and motor output modalities, reward anticipation, spatial attention, and more.  
830 Dynamics at the level of individual neurons could be a natural consequence of the  
831 implementation of such a flexible input and output structure instantiated in an overlapping



832 fashion in a population of neurons. In such an environment, stable population readouts might be  
833 achieved in a manner that allows the stored memory item to be separated from the other  
834 variables concurrently represented in the network (Murray et al 2017, Rigotti et al 2013).

835

### 836 *Limitations of this study*

837         The design of the current study incorporated two choices that are worthy of discussion  
838 here. First, our targets were concentrated in the central 30° of visual angle (up to 15° saccade  
839 amplitudes in 8 directions) in our 8Ar recordings, and fixed at 10° saccade amplitudes (8  
840 directions) in FEF (a compromise eccentricity effective in driving responses for many neurons in  
841 the region of our FEF electrode tracks). The seminal work measuring topography in 8Ar (Suzuki  
842 & Azuma 1983) reported a medial-lateral gradient with smaller, more foveal RFs located  
843 laterally and larger, more eccentric RFs located medially. In the region just dorsal to the  
844 principal sulcus, where our arrays were implanted, they recorded from some neurons with RFs  
845 that were centered beyond the extent of our target array. Thus, in some cases we may have  
846 recorded from 8Ar neurons in which we found weak or absent tuning merely because we did not  
847 present stimuli at the ideal location for each neuron. A hint of this can be seen in our response  
848 maps (Figure 11), where some neurons exhibit tuned responses at the edges of the tested  
849 region. Prior to establishing the target array tested here we did test each animal with larger  
850 eccentricity targets (up to 20-25°), and did not observe qualitatively better tuning at the  
851 population level, although some individual neurons did have tuning at those eccentricities.  
852 Moreover, our findings closely mirror recent studies of 8Ar (Bullock et al 2017, Kiani et al 2015),  
853 in terms of the implanted array locations and targets tested. Although the overall trend in this  
854 previous work supports a medial-lateral gradient in RF eccentricity, the relatively weak  
855 clustering of receptive field location is evident in the large scatter of RF centers we observed for  
856 even neighboring electrodes (Figure 11). Overall, our experiments were performed with the goal

857 of identifying the response properties of neurons in 8Ar and FEF to a canonical set of stimuli for  
858 which the population was tuned, not necessarily the ideal stimuli for every neuron in the  
859 population. Thus, we cannot rule out that some of the differences we observed between 8Ar and  
860 FEF were due to the choices we made in the target locations we tested or sampling differences  
861 in our recordings of the two areas.

862 Our task was designed with a fixed 0.2 s pre-stimulus delay period prior to stimulus  
863 onset, and a fixed post-stimulus delay period of 0.5 s (or 0.6 s for FEF). We chose this fixed  
864 delay to maintain as constant a trial structure as possible, but this could have led to influence of  
865 the post-saccadic response on the baseline firing rate prior to the stimulus, as well as  
866 anticipatory saccade preparation toward the end of the delay period. With a much longer pre-  
867 stimulus delay (0.65 s), Bullock et al (2017) also reported suppressive regions in the RF often  
868 located opposite excitatory regions, and shifts in tuning between visual and perisaccadic  
869 epochs. Furthermore, we found suppressive regions often did not directly oppose excitatory  
870 regions (e.g., Figure 5A), making it unlikely that post-saccadic response alone could explain the  
871 suppression. Because our delay period was fixed, subjects could have begun saccade planning  
872 prior to the end of the delay period at fixation offset. This paradigm is known to contribute to  
873 early buildup in motor preparatory activity in the superior colliculus (Dorris & Munoz 1998), and  
874 thereby might have contributed to the rapid timescale over which we observed the transition  
875 from a visual to motor code in the neuronal population. However, such an effect would not have  
876 produced the pattern of excitatory and suppressive responses or the spatial shifts in RF tuning  
877 that we observed.

878

### 879 *Conclusions*

880 Our results extend the literature in three key ways. First, due to the spatial resolution of  
881 our task, we were able to with high fidelity map the visual and saccadic responses of

882 populations of 8Ar single neurons. We found a rich pattern of excitatory and suppressive  
883 responses in 8Ar that represented the entire visual field through contralateral and ipsilateral  
884 tuning. Second, the observed tuning shifted between epochs, quite often to the opposite  
885 hemifield, indicating what may be perceived as random dynamics are actually the result of a  
886 transition between a visual and motor code. Finally, we compared single neuron and population  
887 level responses from 8Ar and FEF, highlighting the unique dynamics of individual neurons and  
888 the population code in 8Ar even in a simple memory guided saccade paradigm. Taken together,  
889 these results demonstrate rich, but separate, visual and saccadic spatial representations in PFC  
890 underlie its flexible role in sensory and motor behavior.

891

## 892 **References**

- 893 Astrand E, Enel P, Ibos G, Dominey PF, Baraduc P, Ben Hamed S. 2014. Comparison  
894 of classifiers for decoding sensory and cognitive information from prefrontal  
895 neuronal populations. *PLoS One* 9: e86314
- 896 Barak O, Tsodyks M, Romo R. 2010. Neuronal population coding of parametric working  
897 memory. *J Neurosci* 30: 9424-30
- 898 Barbas H, Mesulam MM. 1981. Organization of afferent input to subdivisions of area 8  
899 in the rhesus monkey. *J Comp Neurol* 200: 407-31
- 900 Ben Hamed S, Duhamel JR, Bremmer F, Graf W. 2001. Representation of the visual  
901 field in the lateral intraparietal area of macaque monkeys: a quantitative receptive  
902 field analysis. *Exp Brain Res* 140: 127-44
- 903 Blatt GJ, Andersen RA, Stoner GR. 1990. Visual receptive field organization and  
904 cortico-cortical connections of the lateral intraparietal area (area LIP) in the  
905 macaque. *J Comp Neurol* 299: 421-45

- 906 Boch RA, Goldberg ME. 1989. Participation of prefrontal neurons in the preparation of  
907 visually guided eye movements in the rhesus monkey. *J Neurophysiol* 61: 1064-  
908 84
- 909 Borra E, Gerbella M, Rozzi S, Luppino G. 2015. Projections from caudal ventrolateral  
910 prefrontal areas to brainstem preoculomotor structures and to Basal Ganglia and  
911 cerebellar oculomotor loops in the macaque. *Cereb Cortex* 25: 748-64
- 912 Brainard DH. 1997. The Psychophysics Toolbox. *Spat Vis* 10: 433-6
- 913 Bruce CJ, Goldberg ME. 1985. Primate frontal eye fields. I. Single neurons discharging  
914 before saccades. *J Neurophysiol* 53: 603-35
- 915 Bruce CJ, Goldberg ME, Bushnell MC, Stanton GB. 1985. Primate frontal eye fields. II.  
916 Physiological and anatomical correlates of electrically evoked eye movements. *J*  
917 *Neurophysiol* 54: 714-34
- 918 Bullock KR, Pieper F, Sachs AJ, Martinez-Trujillo JC. 2017. Visual and presaccadic  
919 activity in area 8Ar of the macaque monkey lateral prefrontal cortex. *J*  
920 *Neurophysiol* 118: 15-28
- 921 Constantinidis C, Funahashi S, Lee D, Murray JD, Qi XL, et al. 2018. Persistent Spiking  
922 Activity Underlies Working Memory. *J Neurosci* 38: 7020-28
- 923 Crapse TB, Sommer MA. 2009. Frontal eye field neurons with spatial representations  
924 predicted by their subcortical input. *J Neurosci* 29: 5308-18
- 925 Cynader M, Berman N. 1972. Receptive-field organization of monkey superior  
926 colliculus. *J Neurophysiol* 35: 187-201
- 927 Desimone R, Ungerleider LG. 1986. Multiple visual areas in the caudal superior  
928 temporal sulcus of the macaque. *J Comp Neurol* 248: 164-89

- 929 Donahue CH, Lee D. 2015. Dynamic routing of task-relevant signals for decision making  
930 in dorsolateral prefrontal cortex. *Nat Neurosci* 18: 295-301
- 931 Dorris MC, Munoz DP. 1998. Saccadic probability influences motor preparation signals  
932 and time to saccadic initiation. *J Neurosci* 18: 7015-26
- 933 Dunn CA, Colby CL. 2010. Representation of the ipsilateral visual field by neurons in  
934 the macaque lateral intraparietal cortex depends on the forebrain commissures. *J*  
935 *Neurophysiol* 104: 2624-33
- 936 Ferraina S, Pare M, Wurtz RH. 2002. Comparison of cortico-cortical and cortico-  
937 collicular signals for the generation of saccadic eye movements. *J Neurophysiol*  
938 87: 845-58
- 939 Fukushima J, Fukushima K, Miyasaka K, Yamashita I. 1994. Voluntary control of  
940 saccadic eye movement in patients with frontal cortical lesions and parkinsonian  
941 patients in comparison with that in schizophrenics. *Biol Psychiatry* 36: 21-30
- 942 Funahashi S, Bruce CJ, Goldman-Rakic PS. 1989. Mnemonic coding of visual space in  
943 the monkey's dorsolateral prefrontal cortex. *J Neurophysiol* 61: 331-49
- 944 Funahashi S, Bruce CJ, Goldman-Rakic PS. 1990. Visuospatial coding in primate  
945 prefrontal neurons revealed by oculomotor paradigms. *J Neurophysiol* 63: 814-31
- 946 Funahashi S, Bruce CJ, Goldman-Rakic PS. 1991. Neuronal activity related to saccadic  
947 eye movements in the monkey's dorsolateral prefrontal cortex. *J Neurophysiol*  
948 65: 1464-83
- 949 Fuster JM, Alexander GE. 1971. Neuron activity related to short-term memory. *Science*  
950 173: 652-4

- 951 Gattass R, Gross CG. 1981. Visual topography of striate projection zone (MT) in  
952 posterior superior temporal sulcus of the macaque. *J Neurophysiol* 46: 621-38
- 953 Gattass R, Gross CG, Sandell JH. 1981. Visual topography of V2 in the macaque. *J*  
954 *Comp Neurol* 201: 519-39
- 955 Gattass R, Sousa AP, Gross CG. 1988. Visuotopic organization and extent of V3 and  
956 V4 of the macaque. *J Neurosci* 8: 1831-45
- 957 Goldberg ME, Wurtz RH. 1972. Activity of superior colliculus in behaving monkey. I.  
958 Visual receptive fields of single neurons. *J Neurophysiol* 35: 542-59
- 959 Goldman-Rakic PS. 1995. Cellular basis of working memory. *Neuron* 14: 477-85
- 960 Hikosaka O, Wurtz RH. 1983. Visual and oculomotor functions of monkey substantia  
961 nigra pars reticulata. III. Memory-contingent visual and saccade responses. *J*  
962 *Neurophysiol* 49: 1268-84
- 963 Huerta MF, Krubitzer LA, Kaas JH. 1986. Frontal eye field as defined by intracortical  
964 microstimulation in squirrel monkeys, owl monkeys, and macaque monkeys: I.  
965 Subcortical connections. *J Comp Neurol* 253: 415-39
- 966 Huerta MF, Krubitzer LA, Kaas JH. 1987. Frontal eye field as defined by intracortical  
967 microstimulation in squirrel monkeys, owl monkeys, and macaque monkeys. II.  
968 Cortical connections. *J Comp Neurol* 265: 332-61
- 969 Jun JK, Miller P, Hernandez A, Zainos A, Lemus L, et al. 2010. Heterogenous  
970 population coding of a short-term memory and decision task. *J Neurosci* 30: 916-  
971 29

- 972 Kelly RC, Smith MA, Samonds JM, Kohn A, Bonds AB, et al. 2007. Comparison of  
973 recordings from microelectrode arrays and single electrodes in the visual cortex.  
974 *J Neurosci* 27: 261-4
- 975 Khanna SB, Snyder AC, Smith MA. 2019. Distinct sources of variability affect eye  
976 movement preparation. *J Neurosci*
- 977 Kiani R, Cueva CJ, Reppas JB, Peixoto D, Ryu SI, Newsome WT. 2015. Natural  
978 grouping of neural responses reveals spatially segregated clusters in prearcuate  
979 cortex. *Neuron* 85: 1359-73
- 980 Kleiner M, Brainard D, Pelli D, Ingling A, Murray R, Broussard C. 2007. What's new in  
981 Psychtoolbox-3. *Perception* 36: 1
- 982 Krauzlis RJ, Lovejoy LP, Zenon A. 2013. Superior colliculus and visual spatial attention.  
983 *Annu Rev Neurosci* 36: 165-82
- 984 Kubota K, Niki H. 1971. Prefrontal cortical unit activity and delayed alternation  
985 performance in monkeys. *J Neurophysiol* 34: 337-47
- 986 Lawrence BM, White RL, 3rd, Snyder LH. 2005. Delay-period activity in visual,  
987 visuomovement, and movement neurons in the frontal eye field. *J Neurophysiol*  
988 94: 1498-508
- 989 Leavitt ML, Pieper F, Sachs AJ, Martinez-Trujillo JC. 2017. A Quadrantic Bias in  
990 Prefrontal Representation of Visual-Mnemonic Space. *Cereb Cortex*: 1-17
- 991 Leichnetz GR, Goldberg ME. 1988. Higher centers concerned with eye movement and  
992 visual attention: cerebral cortex and thalamus. *Rev Oculomot Res* 2: 365-429
- 993 Leichnetz GR, Smith DJ, Spencer RF. 1984. Cortical projections to the paramedian  
994 tegmental and basilar pons in the monkey. *J Comp Neurol* 228: 388-408

- 995 Leichnetz GR, Spencer RF, Hardy SG, Astruc J. 1981. The prefrontal corticotectal  
996 projection in the monkey; an anterograde and retrograde horseradish peroxidase  
997 study. *Neuroscience* 6: 1023-41
- 998 Leon MI, Shadlen MN. 1999. Effect of expected reward magnitude on the response of  
999 neurons in the dorsolateral prefrontal cortex of the macaque. *Neuron* 24: 415-25
- 1000 Lundqvist M, Herman P, Miller EK. 2018. Working Memory: Delay Activity, Yes!  
1001 Persistent Activity? Maybe Not. *J Neurosci* 38: 7013-19
- 1002 Lundqvist M, Rose J, Herman P, Brincat SL, Buschman TJ, Miller EK. 2016. Gamma  
1003 and Beta Bursts Underlie Working Memory. *Neuron* 90: 152-64
- 1004 Mayo JP, DiTomasso AR, Sommer MA, Smith MA. 2015. Dynamics of visual receptive  
1005 fields in the macaque frontal eye field. *J Neurophysiol* 114: 3201-10
- 1006 Medalla M, Barbas H. 2006. Diversity of laminar connections linking periarculate and  
1007 lateral intraparietal areas depends on cortical structure. *Eur J Neurosci* 23: 161-  
1008 79
- 1009 Meyers EM, Freedman DJ, Kreiman G, Miller EK, Poggio T. 2008. Dynamic population  
1010 coding of category information in inferior temporal and prefrontal cortex. *J*  
1011 *Neurophysiol* 100: 1407-19
- 1012 Meyers EM, Liang A, Katsuki F, Constantinidis C. 2018. Differential Processing of  
1013 Isolated Object and Multi-item Pop-Out Displays in LIP and PFC. *Cereb Cortex*  
1014 28: 3816-28
- 1015 Mikami A, Ito S, Kubota K. 1982. Visual response properties of dorsolateral prefrontal  
1016 neurons during visual fixation task. *J Neurophysiol* 47: 593-605



- 1017 Murray JD, Bernacchia A, Roy NA, Constantinidis C, Romo R, Wang XJ. 2017. Stable  
1018 population coding for working memory coexists with heterogeneous neural  
1019 dynamics in prefrontal cortex. *Proc Natl Acad Sci U S A* 114: 394-99
- 1020 Parthasarathy A, Herikstad R, Bong JH, Medina FS, Libedinsky C, Yen SC. 2017.  
1021 Mixed selectivity morphs population codes in prefrontal cortex. *Nat Neurosci* 20:  
1022 1770-79
- 1023 Patel GH, Shulman GL, Baker JT, Akbudak E, Snyder AZ, et al. 2010. Topographic  
1024 organization of macaque area LIP. *Proc Natl Acad Sci U S A* 107: 4728-33
- 1025 Pelli DG. 1997. The VideoToolbox software for visual psychophysics: transforming  
1026 numbers into movies. *Spat Vis* 10: 437-42
- 1027 Pierrot-Deseilligny C, Rivaud S, Gaymard B, Agid Y. 1991. Cortical control of memory-  
1028 guided saccades in man. *Exp Brain Res* 83: 607-17
- 1029 Ploner CJ, Gaymard BM, Rivaud-Pechoux S, Pierrot-Deseilligny C. 2005. The prefrontal  
1030 substrate of reflexive saccade inhibition in humans. *Biol Psychiatry* 57: 1159-65
- 1031 Preuss TM, Goldman-Rakic PS. 1991. Myelo- and cytoarchitecture of the granular  
1032 frontal cortex and surrounding regions in the strepsirhine primate Galago and the  
1033 anthropoid primate Macaca. *J Comp Neurol* 310: 429-74
- 1034 Rigotti M, Barak O, Warden MR, Wang XJ, Daw ND, et al. 2013. The importance of  
1035 mixed selectivity in complex cognitive tasks. *Nature* 497: 585-90
- 1036 Riley MR, Qi XL, Constantinidis C. 2017. Functional specialization of areas along the  
1037 anterior-posterior axis of the primate prefrontal cortex. *Cereb Cortex* 27: 3683-97
- 1038 Romo R, Brody CD, Hernandez A, Lemus L. 1999. Neuronal correlates of parametric  
1039 working memory in the prefrontal cortex. *Nature* 399: 470-3

- 1040 Sadeh M, Sajad A, Wang H, Yan X, Crawford JD. 2015. Spatial transformations  
1041 between superior colliculus visual and motor response fields during head-  
1042 unrestrained gaze shifts. *Eur J Neurosci* 42: 2934-51
- 1043 Sajad A, Sadeh M, Keith GP, Yan X, Wang H, Crawford JD. 2015. Visual-Motor  
1044 Transformations Within Frontal Eye Fields During Head-Unrestrained Gaze  
1045 Shifts in the Monkey. *Cereb Cortex* 25: 3932-52
- 1046 Sajad A, Sadeh M, Yan X, Wang H, Crawford JD. 2016. Transition from Target to Gaze  
1047 Coding in Primate Frontal Eye Field during Memory Delay and Memory-Motor  
1048 Transformation. *eNeuro* 3
- 1049 Sato TR, Schall JD. 2003. Effects of stimulus-response compatibility on neural selection  
1050 in frontal eye field. *Neuron* 38: 637-48
- 1051 Schall JD. 1991. Neuronal activity related to visually guided saccades in the frontal eye  
1052 fields of rhesus monkeys: comparison with supplementary eye fields. *J*  
1053 *Neurophysiol* 66: 559-79
- 1054 Schall JD, Morel A, King DJ, Bullier J. 1995. Topography of visual cortex connections  
1055 with frontal eye field in macaque: convergence and segregation of processing  
1056 streams. *J Neurosci* 15: 4464-87
- 1057 Schiller PH, Koerner F. 1971. Discharge characteristics of single units in superior  
1058 colliculus of the alert rhesus monkey. *J Neurophysiol* 34: 920-36
- 1059 Schlag J, Schlag-Rey M. 1987. Evidence for a supplementary eye field. *J Neurophysiol*  
1060 57: 179-200
- 1061 Schmolesky MT, Wang Y, Hanes DP, Thompson KG, Leutgeb S, et al. 1998. Signal  
1062 timing across the macaque visual system. *J Neurophysiol* 79: 3272-8

- 1063 Segraves MA, Goldberg ME. 1987. Functional properties of corticotectal neurons in the  
1064 monkey's frontal eye field. *J Neurophysiol* 58: 1387-419
- 1065 Shoham S, Fellows MR, Normann RA. 2003. Robust, automatic spike sorting using  
1066 mixtures of multivariate t-distributions. *J Neurosci Methods* 127: 111-22
- 1067 Smith MA, Bair W, Movshon JA. 2002. Signals in macaque striate cortical neurons that  
1068 support the perception of glass patterns. *J Neurosci* 22: 8334-45
- 1069 Smith MA, Majaj NJ, Movshon JA. 2005. Dynamics of motion signaling by neurons in  
1070 macaque area MT. *Nat Neurosci* 8: 220-8
- 1071 Sommer MA, Wurtz RH. 2000. Composition and topographic organization of signals  
1072 sent from the frontal eye field to the superior colliculus. *J Neurophysiol* 83: 1979-  
1073 2001
- 1074 Spaak E, Watanabe K, Funahashi S, Stokes MG. 2017. Stable and Dynamic Coding for  
1075 Working Memory in Primate Prefrontal Cortex. *J Neurosci* 37: 6503-16
- 1076 Stanton GB, Bruce CJ, Goldberg ME. 1993. Topography of projections to the frontal  
1077 lobe from the macaque frontal eye fields. *J Comp Neurol* 330: 286-301
- 1078 Stanton GB, Bruce CJ, Goldberg ME. 1995. Topography of projections to posterior  
1079 cortical areas from the macaque frontal eye fields. *J Comp Neurol* 353: 291-305
- 1080 Stanton GB, Goldberg ME, Bruce CJ. 1988. Frontal eye field efferents in the macaque  
1081 monkey: II. Topography of terminal fields in midbrain and pons. *J Comp Neurol*  
1082 271: 493-506
- 1083 Stokes MG. 2015. 'Activity-silent' working memory in prefrontal cortex: a dynamic  
1084 coding framework. *Trends Cogn Sci* 19: 394-405

- 1085 Stokes MG, Kusunoki M, Sigala N, Nili H, Gaffan D, Duncan J. 2013. Dynamic coding  
1086 for cognitive control in prefrontal cortex. *Neuron* 78: 364-75
- 1087 Suzuki H, Azuma M. 1983. Topographic studies on visual neurons in the dorsolateral  
1088 prefrontal cortex of the monkey. *Exp Brain Res* 53: 47-58
- 1089 Tanji J, Hoshi E. 2008. Role of the lateral prefrontal cortex in executive behavioral  
1090 control. *Physiol Rev* 88: 37-57
- 1091 Ungerleider LG. 1983. Cortical Sensory Organization, Vol. 2: Multiple Visual Areas:  
1092 edited by Clinton N. Woolsey, The Humana Press, Inc., 1981. \$34.50 (USA and  
1093 Canada) \$44.50 (elsewhere) (xv + 222 pages) ISBN 0 896 03031 8. *Trends in*  
1094 *Neurosciences* 6: 434
- 1095 Van Essen DC, Maunsell JH, Bixby JL. 1981. The middle temporal visual area in the  
1096 macaque: myeloarchitecture, connections, functional properties and topographic  
1097 organization. *J Comp Neurol* 199: 293-326
- 1098 Wallis JD, Anderson KC, Miller EK. 2001. Single neurons in prefrontal cortex encode  
1099 abstract rules. *Nature* 411: 953-6
- 1100 Warden MR, Miller EK. 2007. The representation of multiple objects in prefrontal  
1101 neuronal delay activity. *Cereb Cortex* 17 Suppl 1: i41-50
- 1102 Watanabe M. 1996. Reward expectancy in primate prefrontal neurons. *Nature* 382: 629-  
1103 32
- 1104 Wurtz RH, Goldberg ME. 1972. Activity of superior colliculus in behaving monkey. 3.  
1105 Cells discharging before eye movements. *J Neurophysiol* 35: 575-86
- 1106 Zaksas D, Pasternak T. 2006. Directional signals in the prefrontal cortex and in area MT  
1107 during a working memory for visual motion task. *J Neurosci* 26: 11726-42

1108 Zirnsak M, Steinmetz NA, Noudoost B, Xu KZ, Moore T. 2014. Visual space is  
1109 compressed in prefrontal cortex before eye movements. *Nature* 507: 504-7  
1110
